# Supplementary material for: Three distinct Holocene intervals of stalagmite deposition and nondeposition revealed in NW Madagascar, and their paleoclimate implications
Source: Copernicus journal article supplement (doi:10.5194/cp-13-1771-2017), 2017-12-04
Supplement: Supplementary file 1 [file ANJB2&MAJ5_data_for_Clim.Past_20171029.xlsx]

## Sheet: stable isotopes
Depth	Age model	d13C raw (‰ VPDB)	d18O raw (‰ VPDB)	d13C (‰ VPDB)**	d18O (‰ VPDB)**	Mineralogy	Sample ID
0.2	140.641	2.643	-3.872	0.943	-4.672	A	ANJ-B-2-001
0.610526	145.162	2.545	-3.902	0.845	-4.702	A	ANJ-B-2-002
1.02105	149.695	3.291	-3.771	1.591	-4.571	A	ANJ-B-2-003
1.43158	154.23	3.217	-4.763	1.517	-5.563	A	ANJ-B-2-004
1.84211	158.757	3.526	-4.207	1.826	-5.007	A	ANJ-B-2-005
2.25263	163.267	3.645	-4.238	1.945	-5.038	A	ANJ-B-2-006
2.66316	167.756	3.895	-4.542	2.195	-5.342	A	ANJ-B-2-007
3.07368	172.232	3.805	-4.436	2.105	-5.236	A	ANJ-B-2-008
3.48421	176.705	3.584	-4.556	1.884	-5.356	A	ANJ-B-2-009
3.89474	181.185	2.877	-5.01	1.177	-5.81	A	ANJ-B-2-010
4.30526	185.795	3.784	-5.099	2.084	-5.899	A	ANJ-B-2-011
4.71579	190.318	3.884	-5.275	2.184	-6.075	A	ANJ-B-2-012
5.12632	194.86	4.274	-4.578	2.574	-5.378	A	ANJ-B-2-013
5.53684	199.415	3.991	-4.424	2.291	-5.224	A	ANJ-B-2-014
5.94737	203.976	4.109	-4.087	2.409	-4.887	A	ANJ-B-2-015
6.35789	208.539	4.211	-4.185	2.511	-4.985	A	ANJ-B-2-016
6.76842	213.098	4.512	-4.338	2.812	-5.138	A	ANJ-B-2-017
7.17895	217.654	4.429	-4.211	2.729	-5.011	A	ANJ-B-2-018
7.58947	222.206	4.339	-4.899	2.639	-5.699	A	ANJ-B-2-019
8	226.752	4.541	-4.587	2.841	-5.387	A	ANJ-B-2-020
8.41053	231.294	4.711	-3.668	3.011	-4.468	A	ANJ-B-2-021
8.82105	235.834	4.174	-4.496	2.474	-5.296	A	ANJ-B-2-022
9.23158	240.382	4.003	-4.751	2.303	-5.551	A	ANJ-B-2-023
9.64211	244.948	3.801	-3.876	2.101	-4.676	A	ANJ-B-2-024
10.0526	249.539	4.146	-4.639	2.446	-5.439	A	ANJ-B-2-025
10.4632	254.165	4.347	-4.368	2.647	-5.168	A	ANJ-B-2-026
10.8737	258.821	5.006	-3.612	3.306	-4.412	A	ANJ-B-2-027
11.2842	263.493	4.556	-3.794	2.856	-4.594	A	ANJ-B-2-028
11.6947	268.167	4.777	-4.117	3.077	-4.917	A	ANJ-B-2-029
12.1053	272.943	4.723	-4.3	3.023	-5.1	A	ANJ-B-2-030
12.5158	277.581	4.496	-4.41	2.796	-5.21	A	ANJ-B-2-031
12.9263	282.19	4.44	-4.386	2.74	-5.186	A	ANJ-B-2-032
13.3368	286.774	4.688	-3.686	2.988	-4.486	A	ANJ-B-2-033
13.7474	291.332	4.818	-3.595	3.118	-4.395	A	ANJ-B-2-034
14.1579	295.866	4.404	-5.514	2.704	-6.314	A	ANJ-B-2-035
14.5684	300.372	4.415	-5.695	2.715	-6.495	A	ANJ-B-2-036
14.9789	304.819	4.261	-5.064	2.561	-5.864	A	ANJ-B-2-037
15.3895	309.165	4.436	-5.149	2.736	-5.949	A	ANJ-B-2-038
15.8	313.369	4.375	-4.586	2.675	-5.386	A	ANJ-B-2-039
16.2105	317.391	4.688	-4.86	2.988	-5.66	A	ANJ-B-2-040
16.6211	321.183	2.848	-5.166	1.148	-5.966	A	ANJ-B-2-041
17.0316	324.67	3.771	-4.838	2.071	-5.638	A	ANJ-B-2-042
17.4421	327.773	3.775	-5.135	2.075	-5.935	A	ANJ-B-2-043
17.8526	330.413	3.829	-4.689	2.129	-5.489	A	ANJ-B-2-044
18.2632	332.511	3.842	-5.08	2.142	-5.88	A	ANJ-B-2-045
18.6737	334.108	4.544	-3.992	2.844	-4.792	A	ANJ-B-2-046
19.0842	335.563	4.184	-4.228	2.484	-5.028	A	ANJ-B-2-047
19.4947	337.286	2.822	-4.809	1.122	-5.609	A	ANJ-B-2-048
19.9053	339.755	4.35	-3.684	2.65	-4.484	A	ANJ-B-2-049
20.3158	343.268	4.143	-3.837	2.443	-4.637	A	ANJ-B-2-050
20.7263	347.988	3.599	-3.341	1.899	-4.141	A	ANJ-B-2-051
21.1368	353.529	3.687	-3.574	1.987	-4.374	A	ANJ-B-2-052
21.5474	359.456	4.151	-3.517	2.451	-4.317	A	ANJ-B-2-053
21.9579	365.331	5.078	-3.535	3.378	-4.335	A	ANJ-B-2-054
22.3684	370.732	4.856	-3.823	3.156	-4.623	A	ANJ-B-2-055
22.7789	375.632	4.727	-4.301	3.027	-5.101	A	ANJ-B-2-056
23.1895	380.51	4.892	-4.102	3.192	-4.902	A	ANJ-B-2-057
23.6	385.873	5.149	-4.115	3.449	-4.915	A	ANJ-B-2-058
24.0105	392.229	4.504	-4.215	2.804	-5.015	A	ANJ-B-2-059
24.4211	400.07	4.813	-4.302	3.113	-5.102	A	ANJ-B-2-060
24.8316	409.562	4.655	-4.785	2.955	-5.585	A	ANJ-B-2-061
25.2421	420.571	4.68	-4.085	2.98	-4.885	A	ANJ-B-2-062
25.6526	432.955	4.565	-5.211	2.865	-6.011	A	ANJ-B-2-063
26.0632	446.573	4.693	-4.409	2.993	-5.209	A	ANJ-B-2-064
26.4737	461.272	4.916	-4.559	3.216	-5.359	A	ANJ-B-2-065
26.8842	476.813	4.897	-4.345	3.197	-5.145	A	ANJ-B-2-066
27.2947	492.893	5.016	-3.834	3.316	-4.634	A	ANJ-B-2-067
27.7053	509.607	4.545	-4.609	2.845	-5.409	A	ANJ-B-2-068
28.1158	525.851	4.197	-3.82	2.497	-4.62	A	ANJ-B-2-069
28.5263	541.784	4.605	-3.554	2.905	-4.354	A	ANJ-B-2-070
28.9368	557.654	4.745	-3.537	3.045	-4.337	A	ANJ-B-2-071
29.3474	573.923	4.755	-4.329	3.055	-5.129	A	ANJ-B-2-072
29.7579	591.051	4.631	-4.177	2.931	-4.977	A	ANJ-B-2-073
30.1684	609.502	4.613	-4.421	2.913	-5.221	A	ANJ-B-2-074
30.5789	629.662	4.995	-3.819	3.295	-4.619	A	ANJ-B-2-075
30.9895	651.54	5.052	-3.687	3.352	-4.487	A	ANJ-B-2-076
31.4	675.029	4.966	-3.818	3.266	-4.618	A	ANJ-B-2-077
31.8105	700.022	4.601	-4.308	2.901	-5.108	A	ANJ-B-2-078
32.2211	726.411	4.747	-4.204	3.047	-5.004	A	ANJ-B-2-079
32.6316	754.03	5.059	-4.175	3.359	-4.975	A	ANJ-B-2-080
33.0421	782.512	2.775	-4.65	1.075	-5.45	A	ANJ-B-2-081
33.4526	811.446	2.774	-5.081	1.074	-5.881	A	ANJ-B-2-082
33.8632	840.421	4.312	-4.589	2.612	-5.389	A	ANJ-B-2-083
34.2737	869.028	3.742	-4.666	2.042	-5.466	A	ANJ-B-2-084
34.6842	897.004	2.462	-5.446	0.762	-6.246	A	ANJ-B-2-085
35.0947	924.446	2.089	-4.787	0.389	-5.587	A	ANJ-B-2-086
35.5053	952.161	2.315	-5.655	0.615	-6.455	A	ANJ-B-2-087
35.9158	978.983	1.788	-5.432	1.788	-5.432	C	ANJ-B-2-088
36.3263	1005.72	2.407	-5.099	2.407	-5.099	C	ANJ-B-2-089
36.7368	1032.43	1.899	-4.831	1.899	-4.831	C	ANJ-B-2-090
37.1474	1058.97	1.513	-6.141	1.513	-6.141	C	ANJ-B-2-091
37.5579	1085.19	1.841	-5.589	1.841	-5.589	C	ANJ-B-2-092
37.9684	1110.97	1.799	-5.87	1.799	-5.87	C	ANJ-B-2-093
38.3789	1136.15	1.909	-4.603	1.909	-4.603	C	ANJ-B-2-094
38.7895	1160.54	2.803	-4.251	2.803	-4.251	C	ANJ-B-2-095
39.2	1183.87	2.337	-5.371	2.337	-5.371	C	ANJ-B-2-096
39.6105	1205.88	3.946	-4.139	3.946	-4.139	C	ANJ-B-2-097
40.0211	1226.31	2.229	-5.472	2.229	-5.472	C	ANJ-B-2-098
40.4316	1244.91	2.208	-5.562	2.208	-5.562	C	ANJ-B-2-099
40.8421	1261.83	1.563	-5.991	1.563	-5.991	C	ANJ-B-2-100
41.2526	1277.52	3.836	-4.114	2.136	-4.914	A	ANJ-B-2-101
41.6632	1292.46	3.631	-3.784	3.631	-3.784	C	ANJ-B-2-102
42.0737	1307.11	1.605	-5.342	1.605	-5.342	C	ANJ-B-2-103
42.4842	1321.9	1.435	-6.32	1.435	-6.32	C	ANJ-B-2-104
42.8947	1336.72	2.423	-4.098	0.723	-4.898	A	ANJ-B-2-105
43.3053	1351.48	2.943	-3.806	1.243	-4.606	A	ANJ-B-2-106
43.7158	1365.04	3.399	-3.64	1.699	-4.44	A	ANJ-B-2-107
44.1263	1377.31	3.569	-4.105	1.869	-4.905	A	ANJ-B-2-108
44.5368	1387.91	3.754	-4.189	2.054	-4.989	A	ANJ-B-2-109
44.9474	1396.69	1.178	-5.333	1.178	-5.333	C	ANJ-B-2-110
45.3579	1403.66	1.206	-4.61	1.206	-4.61	C	ANJ-B-2-111
45.7684	1408.8	1.176	-4.797	1.176	-4.797	C	ANJ-B-2-112
46.1789	1410.6	0.716	-5.168	0.716	-5.168	C	ANJ-B-2-113
46.5895	1411.35	0.77	-4.954	0.77	-4.954	C	ANJ-B-2-114
47	1411.44	0.929	-5.564	0.929	-5.564	C	ANJ-B-2-115
47.4105	1411.47	1.257	-5.625	1.257	-5.625	C	ANJ-B-2-116
47.8211	1411.51	1.134	-5.033	1.134	-5.033	C	ANJ-B-2-117
48.2316	1411.54	2.662	-4.898	2.662	-4.898	C	ANJ-B-2-118
48.6421	1411.58	1.992	-5.042	1.992	-5.042	C	ANJ-B-2-119
49.0526	1411.61	2.391	-4.594	2.391	-4.594	C	ANJ-B-2-120
49.4632	1411.64	3.342	-3.848	3.342	-3.848	C	ANJ-B-2-121
49.8737	1412.54	1.105	-5.885	1.105	-5.885	C	ANJ-B-2-122
50.2842	1413.58	1.132	-6.239	1.132	-6.239	C	ANJ-B-2-123
50.6947	1414.67	0.904	-5.583	0.904	-5.583	C	ANJ-B-2-124
51.1053	1415.75	1.109	-5.154	1.109	-5.154	C	ANJ-B-2-125
51.5158	1416.67	0.625	-4.298	0.625	-4.298	C	ANJ-B-2-126
51.9263	1417.35	0.968	-5.087	0.968	-5.087	C	ANJ-B-2-127
52.3368	1417.7	2.5	-5.009	2.5	-5.009	C	ANJ-B-2-128
52.7474	1417.71	0.537	-6.394	0.537	-6.394	C	ANJ-B-2-129
53.1579	1417.73	0.437	-6.038	0.437	-6.038	C	ANJ-B-2-130
53.5684	1417.75	0.462	-5.976	0.462	-5.976	C	ANJ-B-2-131
53.9789	1417.78	0.067	-5.621	0.067	-5.621	C	ANJ-B-2-132
54.3895	1417.8	0.066	-5.204	0.066	-5.204	C	ANJ-B-2-133
54.8	1417.82	0.217	-5.244	0.217	-5.244	C	ANJ-B-2-134
55.2105	1418.38	-0.108	-6.268	-0.108	-6.268	C	ANJ-B-2-135
55.6211	1418.89	-0.602	-5.749	-0.602	-5.749	C	ANJ-B-2-136
56.0316	1419.19	-0.403	-5.696	-0.403	-5.696	C	ANJ-B-2-137
56.4421	1419.31	-0.408	-6.385	-0.408	-6.385	C	ANJ-B-2-138
56.8526	1419.43	-0.755	-5.68	-0.755	-5.68	C	ANJ-B-2-139
57.2632	1419.56	-1.142	-5.963	-1.142	-5.963	C	ANJ-B-2-140
57.6737	1419.68	-1.93	-6.257	-1.93	-6.257	C	ANJ-B-2-141
58.0842	1419.8	-1.916	-5.148	-1.916	-5.148	C	ANJ-B-2-142
58.4947	1419.92	-2.345	-5.9	-2.345	-5.9	C	ANJ-B-2-143
58.9053	1420.05	-2.098	-6.646	-2.098	-6.646	C	ANJ-B-2-144
59.3158	1420.17	-1.424	-6.478	-1.424	-6.478	C	ANJ-B-2-145
59.7263	1421.38	-1.159	-6.191	-1.159	-6.191	C	ANJ-B-2-146
60.1368	1422.49	-0.862	-4.888	-0.862	-4.888	C	ANJ-B-2-147
60.5474	1423.37	-0.946	-5.16	-0.946	-5.16	C	ANJ-B-2-148
60.9579	1424.02	-1.317	-7.262	-1.317	-7.262	C	ANJ-B-2-149
61.3684	1424.53	-1.353	-7.356	-1.353	-7.356	C	ANJ-B-2-150
61.7789	1424.98	-1.206	-5.224	-1.206	-5.224	C	ANJ-B-2-151
62.1895	1425.47	-1.057	-5.336	-1.057	-5.336	C	ANJ-B-2-152
62.6	1426.06	-1.418	-6.013	-1.418	-6.013	C	ANJ-B-2-153
63.0105	1426.73	-1.331	-6.028	-1.331	-6.028	C	ANJ-B-2-154
63.4211	1427.44	-1.861	-6.346	-1.861	-6.346	C	ANJ-B-2-155
63.8316	1428.16	-2.03	-6.096	-2.03	-6.096	C	ANJ-B-2-156
64.2421	1428.83	-1.614	-6.205	-1.614	-6.205	C	ANJ-B-2-157
64.6526	1429.43	-1.61	-6.325	-1.61	-6.325	C	ANJ-B-2-158
65.0632	1429.97	-1.667	-5.78	-1.667	-5.78	C	ANJ-B-2-159
65.4737	1430.46	-1.308	-5.867	-1.308	-5.867	C	ANJ-B-2-160
65.8842	1430.91	-0.999	-6.289	-0.999	-6.289	C	ANJ-B-2-161
66.2947	1431.32	-1.114	-6.297	-1.114	-6.297	C	ANJ-B-2-162
66.7053	1431.72	-0.902	-8.85	-0.902	-8.85	C	ANJ-B-2-163
67.1158	1432.08	-0.921	-6.881	-0.921	-6.881	C	ANJ-B-2-164
67.5263	1432.4	-0.919	-7.415	-0.919	-7.415	C	ANJ-B-2-165
67.9368	1432.67	-0.811	-7.611	-0.811	-7.611	C	ANJ-B-2-166
68.3474	1432.87	-1.095	-6.097	-1.095	-6.097	C	ANJ-B-2-167
68.7579	1433.05	-1.057	-6.322	-1.057	-6.322	C	ANJ-B-2-168
69.1684	1433.23	-1.083	-6.025	-1.083	-6.025	C	ANJ-B-2-169
69.5789	1433.5	-1.056	-5.976	-1.056	-5.976	C	ANJ-B-2-170
69.9895	1433.91	-0.885	-6.456	-0.885	-6.456	C	ANJ-B-2-171
70.4	1434.52	-0.641	-6.228	-0.641	-6.228	C	ANJ-B-2-172
70.8105	1435.3	-0.446	-4.638	-0.446	-4.638	C	ANJ-B-2-173
71.2211	1436.13	-0.553	-4.441	-0.553	-4.441	C	ANJ-B-2-174
71.6316	1436.91	-1.038	-5.503	-1.038	-5.503	C	ANJ-B-2-175
72.0421	1437.51	-1.037	-6	-1.037	-6	C	ANJ-B-2-176
72.4526	1437.82	-1.192	-6.119	-1.192	-6.119	C	ANJ-B-2-177
72.8632	1437.85	-1.111	-5.237	-1.111	-5.237	C	ANJ-B-2-178
73.2737	1437.86	-0.845	-4.969	-0.845	-4.969	C	ANJ-B-2-179
73.6842	1437.87	-1.361	-5.585	-1.361	-5.585	C	ANJ-B-2-180
74.0947	1437.87	-1.646	-5.729	-1.646	-5.729	C	ANJ-B-2-181
74.5053	1437.88	-1.803	-5.661	-1.803	-5.661	C	ANJ-B-2-182
74.9158	1437.89	-2.19	-5.83	-2.19	-5.83	C	ANJ-B-2-183
75.3263	1437.9	-2.309	-5.95	-2.309	-5.95	C	ANJ-B-2-184
75.7368	1437.91	-2.983	-5.373	-2.983	-5.373	C	ANJ-B-2-185
76.1474	1437.92	-2.865	-5.969	-2.865	-5.969	C	ANJ-B-2-186
76.5579	1437.93	-3.589	-6.928	-3.589	-6.928	C	ANJ-B-2-187
76.9684	1437.94	-3.328	-6.111	-3.328	-6.111	C	ANJ-B-2-188
77.3789	1437.95	-4.252	-6.173	-4.252	-6.173	C	ANJ-B-2-189
77.7895	1437.96	-4.193	-6.546	-4.193	-6.546	C	ANJ-B-2-190
78.2	1437.97	-3.853	-5.88	-3.853	-5.88	C	ANJ-B-2-191
78.6105	1437.97	-3.832	-5.817	-3.832	-5.817	C	ANJ-B-2-192
79.0211	1437.98	-4.072	-5.704	-4.072	-5.704	C	ANJ-B-2-193
79.4316	1437.99	-3.769	-6.438	-3.769	-6.438	C	ANJ-B-2-194
79.8421	1438	-3.205	-6.207	-3.205	-6.207	C	ANJ-B-2-195
80.2526	1438.01	-3.745	-6.377	-3.745	-6.377	C	ANJ-B-2-196
80.6632	1438.02	-4.209	-6.217	-4.209	-6.217	C	ANJ-B-2-197
81.0737	1438.03	-3.738	-5.763	-3.738	-5.763	C	ANJ-B-2-198
81.4842	1438.04	-3.793	-5.552	-3.793	-5.552	C	ANJ-B-2-199
81.8947	1438.05	-3.566	-5.488	-3.566	-5.488	C	ANJ-B-2-200
82.3053	1438.06	-3.248	-4.995	-3.248	-4.995	C	ANJ-B-2-201
82.7158	1438.06	-3.213	-5.113	-3.213	-5.113	C	ANJ-B-2-202
83.1263	1438.07	-2.632	-4.985	-2.632	-4.985	C	ANJ-B-2-203
83.5368	1438.08	-2.669	-4.89	-2.669	-4.89	C	ANJ-B-2-204
83.9474	1438.09	-2.701	-6.481	-2.701	-6.481	C	ANJ-B-2-205
84.3579	1438.1	-2.379	-5.97	-2.379	-5.97	C	ANJ-B-2-206
84.7684	1438.11	-2.131	-4.761	-2.131	-4.761	C	ANJ-B-2-207
85.1789	1438.12	-2.214	-5.26	-2.214	-5.26	C	ANJ-B-2-208
85.5895	1438.13	-2.563	-6.422	-2.563	-6.422	C	ANJ-B-2-209
86	1438.14	-2.092	-5.922	-2.092	-5.922	C	ANJ-B-2-210
86.4105	1438.15	-2.465	-4.782	-2.465	-4.782	C	ANJ-B-2-211
86.8211	1438.16	-2.404	-4.892	-2.404	-4.892	C	ANJ-B-2-212
87.2316	1438.16	-1.859	-6.477	-1.859	-6.477	C	ANJ-B-2-213
87.6421	1438.17	-2.247	-6.375	-2.247	-6.375	C	ANJ-B-2-214
88.0526	1438.18	-2.367	-7.157	-2.367	-7.157	C	ANJ-B-2-215
88.4632	1438.19	-2.465	-6.538	-2.465	-6.538	C	ANJ-B-2-216
88.8737	1438.2	-2.779	-5.692	-2.779	-5.692	C	ANJ-B-2-217
89.2842	1438.21	-2.912	-5.12	-2.912	-5.12	C	ANJ-B-2-218
89.6947	1438.22	-3.549	-5.28	-3.549	-5.28	C	ANJ-B-2-219
90.1053	1438.23	-3.892	-5.976	-3.892	-5.976	C	ANJ-B-2-220
90.5158	1438.24	-3.048	-7.325	-3.048	-7.325	C	ANJ-B-2-221
90.9263	1438.25	-3.867	-7.388	-3.867	-7.388	C	ANJ-B-2-222
91.3368	1438.25	-3.849	-7.561	-3.849	-7.561	C	ANJ-B-2-223
91.7474	1438.26	-3.614	-7.108	-3.614	-7.108	C	ANJ-B-2-224
92.1579	1438.27	-3.308	-6.275	-3.308	-6.275	C	ANJ-B-2-225
92.5684	1438.28	-2.441	-5.166	-2.441	-5.166	C	ANJ-B-2-226
92.9789	1438.29	-2.686	-6.724	-2.686	-6.724	C	ANJ-B-2-227
93.3895	1438.3	-1.703	-5.281	-1.703	-5.281	C	ANJ-B-2-228
93.8	1438.31	-1.85	-5.261	-1.85	-5.261	C	ANJ-B-2-229
94.2105	1438.32	-1.751	-5.427	-1.751	-5.427	C	ANJ-B-2-230
94.6211	1438.33	-1.735	-5.855	-1.735	-5.855	C	ANJ-B-2-231
95.0316	1438.34	-1.721	-6.404	-1.721	-6.404	C	ANJ-B-2-232
95.4421	1438.34	-1.718	-6.988	-1.718	-6.988	C	ANJ-B-2-233
95.8526	1438.35	-1.531	-6.116	-1.531	-6.116	C	ANJ-B-2-234
96.2632	1438.36	-1.024	-7.625	-1.024	-7.625	C	ANJ-B-2-235
96.6737	1438.37	-1.139	-7.799	-1.139	-7.799	C	ANJ-B-2-236
97.0842	1438.38	-1.32	-5.844	-1.32	-5.844	C	ANJ-B-2-237
97.4947	1438.39	-1.313	-6.087	-1.313	-6.087	C	ANJ-B-2-238
97.9053	1438.4	-1.217	-5.784	-1.217	-5.784	C	ANJ-B-2-239
98.3158	1438.41	-1.031	-6.285	-1.031	-6.285	C	ANJ-B-2-240
98.7263	1438.42	-1.088	-6.523	-1.088	-6.523	C	ANJ-B-2-241
99.1368	1438.43	-1.071	-7.609	-1.071	-7.609	C	ANJ-B-2-242
99.5474	1438.44	-1.014	-6.664	-1.014	-6.664	C	ANJ-B-2-243
99.9579	1438.44	-1.105	-7.548	-1.105	-7.548	C	ANJ-B-2-244
100.368	1438.45	-0.912	-7.377	-0.912	-7.377	C	ANJ-B-2-245
100.779	1438.46	-1.337	-5.864	-1.337	-5.864	C	ANJ-B-2-246
101.189	1438.47	-1.064	-4.917	-1.064	-4.917	C	ANJ-B-2-247
101.6	1438.48	-0.87	-5.515	-0.87	-5.515	C	ANJ-B-2-248
102.011	1438.49	-1.431	-6.515	-1.431	-6.515	C	ANJ-B-2-249
102.421	1438.5	-1.793	-7.229	-1.793	-7.229	C	ANJ-B-2-250
102.832	1438.51	-1.809	-7.002	-1.809	-7.002	C	ANJ-B-2-251
103.242	1438.52	-1.988	-5.643	-1.988	-5.643	C	ANJ-B-2-252
103.653	1438.53	-2.335	-5.17	-2.335	-5.17	C	ANJ-B-2-253
104.063	1438.53	-2.784	-5.197	-2.784	-5.197	C	ANJ-B-2-254
104.474	1438.54	-3.053	-5.508	-3.053	-5.508	C	ANJ-B-2-255
104.884	1438.55	-3.183	-5.037	-3.183	-5.037	C	ANJ-B-2-256
105.295	1438.56	-3.199	-5.43	-3.199	-5.43	C	ANJ-B-2-257
105.705	1438.57	-3.7	-6.976	-3.7	-6.976	C	ANJ-B-2-258
106.116	1438.58	-4.041	-7.93	-4.041	-7.93	C	ANJ-B-2-259
106.526	1438.59	-4.366	-6.911	-4.366	-6.911	C	ANJ-B-2-260
106.937	1438.6	-4.42	-6.854	-4.42	-6.854	C	ANJ-B-2-261
107.347	1438.61	-4.957	-7.107	-4.957	-7.107	C	ANJ-B-2-262
107.758	1438.62	-4.794	-6.248	-4.794	-6.248	C	ANJ-B-2-263
108.168	1438.63	-5.004	-5.528	-5.004	-5.528	C	ANJ-B-2-264
108.579	1438.63	-5.124	-5.492	-5.124	-5.492	C	ANJ-B-2-265
108.989	1438.64	-4.99	-5.482	-4.99	-5.482	C	ANJ-B-2-266
109.4	1440.27	-5.455	-5.998	-5.455	-5.998	C	ANJ-B-2-267
109.811	1442.65	-5.188	-5.888	-6.888	-6.688	A	ANJ-B-2-268
110.221	1445.71	-3.668	-4.374	-5.368	-5.174	A	ANJ-B-2-269
110.632	1449.37	-3.403	-3.359	-5.103	-4.159	A	ANJ-B-2-270
111.042	1453.45	-3.734	-2.606	-5.434	-3.406	A	ANJ-B-2-271
111.453	1457.77	-4.018	-2.597	-5.718	-3.397	A	ANJ-B-2-272
111.863	1462.15	-3.873	-2.81	-5.573	-3.61	A	ANJ-B-2-273
112.274	1466.39	-4.344	-3.162	-6.044	-3.962	A	ANJ-B-2-274
112.684	1474.28	-4.999	-2.52	-6.699	-3.32	A	ANJ-B-2-275
113.095	1482.39	-5.034	-2.269	-5.034	-2.269	C	ANJ-B-2-276
113.505	1491.24	-9.07	-4.434	-9.07	-4.434	C	ANJ-B-2-277
113.916	1500.92	-9.908	-5.257	-9.908	-5.257	C	ANJ-B-2-278
114.326	1512.13	-9.69	-4.979	-9.69	-4.979	C	ANJ-B-2-279
114.737	1524.91	-10.759	-6.188	-10.759	-6.188	C	ANJ-B-2-280
115.147	1538.56	-10.872	-6.121	-10.872	-6.121	C	ANJ-B-2-281
115.558	1552.3	-10.526	-5.067	-10.526	-5.067	C	ANJ-B-2-282
115.968	1565.36	-10.905	-5.567	-10.905	-5.567	C	ANJ-B-2-283
116.379	1577	-8.821	-5.026	-8.821	-5.026	C	ANJ-B-2-284
117	7835.35	-5.309	-3.71	-7.009	-4.51	A	ANJ-B-2-285
117.52	7835.96	-5.96	-4.191	-7.66	-4.991	A	ANJ-B-2-286
118.041	7836.54	-5.987	-4.165	-7.687	-4.965	A	ANJ-B-2-287
118.561	7837.07	-4.843	-3.691	-6.543	-4.491	A	ANJ-B-2-288
119.081	7837.51	-5.394	-3.961	-7.094	-4.761	A	ANJ-B-2-289
119.602	7837.81	-5.394	-3.648	-7.094	-4.448	A	ANJ-B-2-290
120.122	7837.97	-5.669	-4.302	-7.369	-5.102	A	ANJ-B-2-291
120.642	7837.98	-6.529	-5.13	-8.229	-5.93	A	ANJ-B-2-292
121.163	7837.98	-5.42	-4.829	-7.12	-5.629	A	ANJ-B-2-293
121.683	7837.99	-5.137	-4.529	-6.837	-5.329	A	ANJ-B-2-294
122.203	7837.99	-6.097	-3.752	-7.797	-4.552	A	ANJ-B-2-295
122.724	7838	-6.568	-3.848	-8.268	-4.648	A	ANJ-B-2-296
123.244	7838.01	-6.74	-4.054	-8.44	-4.854	A	ANJ-B-2-297
123.764	7838.01	-6.16	-3.873	-7.86	-4.673	A	ANJ-B-2-298
124.285	7838.02	-4.41	-2.296	-6.11	-3.096	A	ANJ-B-2-299
124.805	7838.02	-6.339	-5.045	-8.039	-5.845	A	ANJ-B-2-300
125.325	7838.03	-6.546	-4.246	-8.246	-5.046	A	ANJ-B-2-301
125.846	7838.03	-5.871	-3.277	-7.571	-4.077	A	ANJ-B-2-302
126.366	7838.04	-5.991	-3.713	-7.691	-4.513	A	ANJ-B-2-303
126.886	7838.05	-5.72	-3.926	-7.42	-4.726	A	ANJ-B-2-304
127.407	7838.42	-5.641	-2.835	-7.341	-3.635	A	ANJ-B-2-305
127.927	7839.01	-5.917	-3.742	-7.617	-4.542	A	ANJ-B-2-306
128.447	7839.77	-4.903	-3.231	-6.603	-4.031	A	ANJ-B-2-307
128.967	7840.65	-4.552	-3.642	-6.252	-4.442	A	ANJ-B-2-308
129.488	7841.6	-5.501	-4.085	-7.201	-4.885	A	ANJ-B-2-309
130.008	7842.6	-5.898	-3.581	-7.598	-4.381	A	ANJ-B-2-310
130.528	7843.63	-5.266	-2.908	-6.966	-3.708	A	ANJ-B-2-311
131.049	7844.65	-9.635	-4.208	-9.635	-4.208	C	ANJ-B-2-312
131.569	7845.66	-9.487	-4.494	-9.487	-4.494	C	ANJ-B-2-313
132.089	7846.65	-10.566	-4.861	-10.566	-4.861	C	ANJ-B-2-314
132.61	7847.63	-10.215	-4.413	-10.215	-4.413	C	ANJ-B-2-315
133.13	7848.61	-9.075	-4.334	-9.075	-4.334	C	ANJ-B-2-316
133.65	7849.6	-10.195	-5.237	-10.195	-5.237	C	ANJ-B-2-317
134.171	7850.59	-9.772	-5.065	-9.772	-5.065	C	ANJ-B-2-318
134.691	7851.58	-10.01	-5.02	-10.01	-5.02	C	ANJ-B-2-319
135.211	7852.58	-10.407	-5.131	-10.407	-5.131	C	ANJ-B-2-320
135.732	7853.58	-10.307	-4.688	-10.307	-4.688	C	ANJ-B-2-321
136.252	7854.7	-9.46	-2.682	-9.46	-2.682	C	ANJ-B-2-322
136.772	7856.67	-9.906	-4.789	-9.906	-4.789	C	ANJ-B-2-323
137.293	7858.6	-10.534	-4.698	-10.534	-4.698	C	ANJ-B-2-324
137.813	7860.5	-8.536	-4.975	-8.536	-4.975	C	ANJ-B-2-325
138.333	7862.39	-10.699	-6.091	-10.699	-6.091	C	ANJ-B-2-326
138.854	7864.26	-10.215	-6.583	-10.215	-6.583	C	ANJ-B-2-327
139.374	7866.14	-5.83	-4.488	-7.53	-5.288	A	ANJ-B-2-328
139.894	7868.01	-6.984	-4.918	-8.684	-5.718	A	ANJ-B-2-329
140.415	7869.87	-5.271	-3.438	-6.971	-4.238	A	ANJ-B-2-330
140.935	7871.69	-5.406	-3.505	-7.106	-4.305	A	ANJ-B-2-331
141.455	7873.5	-7.475	-4.688	-9.175	-5.488	A	ANJ-B-2-332
141.976	7875.24	-7.985	-3.724	-9.685	-4.524	A	ANJ-B-2-333
142.496	7876.96	-7.709	-5.333	-9.409	-6.133	A	ANJ-B-2-334
143.016	7878.69	-6.586	-4.344	-8.286	-5.144	A	ANJ-B-2-335
143.537	7880.43	-4.304	-3.362	-6.004	-4.162	A	ANJ-B-2-336
144.057	7882.19	-5.588	-3.934	-7.288	-4.734	A	ANJ-B-2-337
144.577	7883.96	-5.844	-3.875	-7.544	-4.675	A	ANJ-B-2-338
145.098	7885.73	-5.468	-4.091	-7.168	-4.891	A	ANJ-B-2-339
145.618	7887.51	-5.328	-4.164	-7.028	-4.964	A	ANJ-B-2-340
146.138	7889.3	-5.664	-3.545	-7.364	-4.345	A	ANJ-B-2-341
146.659	7891.12	-6.891	-3.857	-8.591	-4.657	A	ANJ-B-2-342
147.179	7893	-7.94	-4.93	-9.64	-5.73	A	ANJ-B-2-343
147.699	7894.94	-6.407	-4.416	-8.107	-5.216	A	ANJ-B-2-344
148.22	7896.91	-6.733	-4.15	-8.433	-4.95	A	ANJ-B-2-345
148.74	7898.91	-6.711	-3.693	-8.411	-4.493	A	ANJ-B-2-346
149.26	7900.91	-7.948	-4.248	-9.648	-5.048	A	ANJ-B-2-347
149.78	7902.9	-8.153	-5.504	-8.153	-5.504	C	ANJ-B-2-348
150.301	7904.87	-9.2	-6.124	-9.2	-6.124	C	ANJ-B-2-349
150.821	7906.83	-8.833	-6.058	-8.833	-6.058	C	ANJ-B-2-350
151.341	7908.76	-8.742	-4.721	-8.742	-4.721	C	ANJ-B-2-351
151.862	7910.7	-8.321	-6.133	-8.321	-6.133	C	ANJ-B-2-352
152.382	7912.67	-7.519	-4.76	-9.219	-5.56	A	ANJ-B-2-353
152.902	7914.71	-6.719	-4.582	-8.419	-5.382	A	ANJ-B-2-354
153.423	7916.85	-6.005	-4.289	-7.705	-5.089	A	ANJ-B-2-355
153.943	7919.06	-6.263	-4.413	-7.963	-5.213	A	ANJ-B-2-356
154.463	7921.29	-6.661	-4.241	-8.361	-5.041	A	ANJ-B-2-357
154.984	7923.5	-6.104	-4.295	-7.804	-5.095	A	ANJ-B-2-358
155.504	7925.64	-6.303	-4.053	-8.003	-4.853	A	ANJ-B-2-359
156.024	7927.74	-5.913	-4.125	-7.613	-4.925	A	ANJ-B-2-360
156.545	7929.85	-6.206	-3.769	-7.906	-4.569	A	ANJ-B-2-361
157.065	7932.05	-6.331	-3.898	-8.031	-4.698	A	ANJ-B-2-362
157.585	7934.28	-6.414	-3.756	-8.114	-4.556	A	ANJ-B-2-363
158.106	7936.54	-6.55	-3.716	-8.25	-4.516	A	ANJ-B-2-364
158.626	7938.8	-6.183	-4.5	-7.883	-5.3	A	ANJ-B-2-365
159.146	7941.01	-5.971	-5.279	-7.671	-6.079	A	ANJ-B-2-366
159.667	7943.16	-6.729	-3.344	-8.429	-4.144	A	ANJ-B-2-367
160.187	7945.3	-5.922	-3.327	-7.622	-4.127	A	ANJ-B-2-368
160.707	7947.49	-5.749	-3.234	-7.449	-4.034	A	ANJ-B-2-369
161.228	7949.79	-5.658	-2.836	-7.358	-3.636	A	ANJ-B-2-370
161.748	7952.19	-6.127	-2.725	-7.827	-3.525	A	ANJ-B-2-371
162.268	7954.66	-6.177	-2.869	-7.877	-3.669	A	ANJ-B-2-372
162.789	7957.14	-6.981	-4.308	-8.681	-5.108	A	ANJ-B-2-373
163.309	7959.57	-7.837	-5.192	-9.537	-5.992	A	ANJ-B-2-374
163.829	7961.95	-7.681	-5.306	-9.381	-6.106	A	ANJ-B-2-375
164.35	7964.29	-7.593	-5.79	-9.293	-6.59	A	ANJ-B-2-376
164.87	7966.63	-6.201	-5.082	-7.901	-5.882	A	ANJ-B-2-377
165.39	7968.97	-7.541	-5.117	-9.241	-5.917	A	ANJ-B-2-378
165.911	7971.32	-6.616	-4.746	-8.316	-5.546	A	ANJ-B-2-379
166.431	7973.69	-7.612	-4.701	-9.312	-5.501	A	ANJ-B-2-380
166.951	7976.08	-8.413	-4.856	-10.113	-5.656	A	ANJ-B-2-381
167.472	7978.48	-7.393	-4.288	-9.093	-5.088	A	ANJ-B-2-382
167.992	7980.88	-7.06	-4.607	-8.76	-5.407	A	ANJ-B-2-383
168.512	7983.25	-7.208	-4.661	-8.908	-5.461	A	ANJ-B-2-384
169.033	7985.57	-7.14	-4.351	-8.84	-5.151	A	ANJ-B-2-385
169.553	7987.82	-8.389	-4.434	-10.089	-5.234	A	ANJ-B-2-386
170.073	7990.04	-6.598	-3.976	-8.298	-4.776	A	ANJ-B-2-387
170.593	7992.27	-7.165	-4.694	-8.865	-5.494	A	ANJ-B-2-388
171.114	7994.53	-6.718	-5.04	-8.418	-5.84	A	ANJ-B-2-389
171.634	7996.86	-6.941	-5.112	-8.641	-5.912	A	ANJ-B-2-390
172.154	7999.23	-7.481	-4.367	-9.181	-5.167	A	ANJ-B-2-391
172.675	8001.63	-7.575	-4.576	-9.275	-5.376	A	ANJ-B-2-392
173.195	8004.1	-6.413	-4.145	-8.113	-4.945	A	ANJ-B-2-393
173.715	8006.51	-7.123	-5.198	-8.823	-5.998	A	ANJ-B-2-394
174.236	8008.92	-6.372	-4.592	-8.072	-5.392	A	ANJ-B-2-395
174.756	8011.32	-7.242	-5.511	-8.942	-6.311	A	ANJ-B-2-396
175.276	8013.71	-7.239	-5.859	-8.939	-6.659	A	ANJ-B-2-397
175.797	8016.11	-6.599	-5.026	-8.299	-5.826	A	ANJ-B-2-398
176.317	8018.54	-6.043	-4.978	-7.743	-5.778	A	ANJ-B-2-399
176.837	8021.05	-7.672	-5.734	-9.372	-6.534	A	ANJ-B-2-400
177.358	8023.66	-8.1	-5.355	-9.8	-6.155	A	ANJ-B-2-401
177.878	8026.36	-6.949	-5.464	-8.649	-6.264	A	ANJ-B-2-402
178.398	8029.11	-6.553	-4.964	-8.253	-5.764	A	ANJ-B-2-403
178.919	8031.87	-7.035	-4.703	-8.735	-5.503	A	ANJ-B-2-404
179.439	8034.63	-6.911	-4.874	-8.611	-5.674	A	ANJ-B-2-405
179.959	8037.39	-6.574	-4.542	-8.274	-5.342	A	ANJ-B-2-406
180.48	8040.18	-5.76	-3.813	-7.46	-4.613	A	ANJ-B-2-407
181	8043.06	-5.3	-3.665	-7	-4.465	A	ANJ-B-2-408
181.52	8046.03	-5.978	-3.948	-7.678	-4.748	A	ANJ-B-2-409
182.041	8049.06	-6.92	-4.383	-8.62	-5.183	A	ANJ-B-2-410
182.561	8052.09	-6.793	-3.992	-8.493	-4.792	A	ANJ-B-2-411
183.081	8055.06	-6.361	-4.11	-8.061	-4.91	A	ANJ-B-2-412
183.602	8057.96	-7.048	-4.747	-8.748	-5.547	A	ANJ-B-2-413
184.122	8060.79	-5.717	-4.464	-7.417	-5.264	A	ANJ-B-2-414
184.642	8063.61	-6.546	-5.376	-8.246	-6.176	A	ANJ-B-2-415
185.163	8066.44	-7.145	-5.321	-8.845	-6.121	A	ANJ-B-2-416
185.683	8069.31	-7.079	-4.79	-8.779	-5.59	A	ANJ-B-2-417
186.203	8072.25	-7.169	-4.762	-8.869	-5.562	A	ANJ-B-2-418
186.724	8075.25	-5.95	-4.335	-7.65	-5.135	A	ANJ-B-2-419
187.244	8078.33	-6.402	-4.126	-6.402	-4.126	C	ANJ-B-2-420
187.764	8081.49	-8.852	-4.433	-8.852	-4.433	C	ANJ-B-2-421
188.285	8084.7	-8.577	-4.477	-8.577	-4.477	C	ANJ-B-2-422
188.805	8087.95	-8.51	-4.702	-8.51	-4.702	C	ANJ-B-2-423
189.325	8091.28	-5.858	-4.429	-7.558	-5.229	A	ANJ-B-2-424
189.846	8094.56	-3.465	-3.756	-5.165	-4.556	A	ANJ-B-2-425
190.366	8097.83	-2.659	-2.785	-4.359	-3.585	A	ANJ-B-2-426
190.886	8101.1	-2.75	-2.867	-4.45	-3.667	A	ANJ-B-2-427
191.407	8104.36	-3.486	-3.355	-5.186	-4.155	A	ANJ-B-2-428
191.927	8107.63	-3.723	-3.461	-5.423	-4.261	A	ANJ-B-2-429
192.447	8110.93	-4.273	-3.537	-5.973	-4.337	A	ANJ-B-2-430
192.967	8114.28	-7.126	-4.809	-8.826	-5.609	A	ANJ-B-2-431
193.488	8117.7	-8.897	-5.337	-10.597	-6.137	A	ANJ-B-2-432
194.008	8121.19	-8.776	-5.074	-10.476	-5.874	A	ANJ-B-2-433
194.528	8124.75	-8.689	-5.796	-8.689	-5.796	C	ANJ-B-2-434
195.049	8128.37	-9.086	-5.523	-9.086	-5.523	C	ANJ-B-2-435
195.569	8132.04	-8.885	-4.832	-8.885	-4.832	C	ANJ-B-2-436
196.089	8135.77	-8.657	-4.655	-8.657	-4.655	C	ANJ-B-2-437
196.61	8139.55	-8.928	-5.004	-8.928	-5.004	C	ANJ-B-2-438
197.13	8143.36	-9.97	-5.485	-9.97	-5.485	C	ANJ-B-2-439
197.65	8147.22	-10.522	-5.677	-10.522	-5.677	C	ANJ-B-2-440
198.171	8151.09	-11.004	-5.877	-11.004	-5.877	C	ANJ-B-2-441
198.691	8154.98	-10.467	-6.706	-10.467	-6.706	C	ANJ-B-2-442
199.211	8158.86	-10.6	-4.557	-10.6	-4.557	C	ANJ-B-2-443
199.732	8162.74	-10.914	-4.65	-10.914	-4.65	C	ANJ-B-2-444
200.252	8166.6	-10.887	-6.713	-10.887	-6.713	C	ANJ-B-2-445
200.772	8170.46	-10.165	-5.533	-10.165	-5.533	C	ANJ-B-2-446
201.293	8174.3	-9.038	-5.167	-9.038	-5.167	C	ANJ-B-2-447
201.813	8178.13	-10.228	-6.427	-10.228	-6.427	C	ANJ-B-2-448
202.333	8181.92	-10.67	-7.167	-10.67	-7.167	C	ANJ-B-2-449
202.854	8185.66	-10.594	-6.828	-10.594	-6.828	C	ANJ-B-2-450
203.374	8189.31	-9.869	-6.456	-9.869	-6.456	C	ANJ-B-2-451
203.894	8192.9	-9.9	-6.328	-9.9	-6.328	C	ANJ-B-2-452
204.415	8196.43	-9.386	-5.452	-11.086	-6.252	A	ANJ-B-2-453
204.935	8199.93	-8.275	-6.367	-9.975	-7.167	A	ANJ-B-2-454
205.455	8203.48	-6.783	-5.023	-8.483	-5.823	A	ANJ-B-2-455
205.976	8207.01	-8.794	-5.763	-10.494	-6.563	A	ANJ-B-2-456
206.496	8210.67	-9.687	-7.147	-11.387	-7.947	A	ANJ-B-2-457
207.016	8214.52	-9.969	-6.14	-11.669	-6.94	A	ANJ-B-2-458
207.537	8218.61	-10.203	-6.365	-11.903	-7.165	A	ANJ-B-2-459
208.057	8222.87	-9.834	-6.72	-11.534	-7.52	A	ANJ-B-2-460
208.577	8227.2	-9.739	-5.27	-11.439	-6.07	A	ANJ-B-2-461
209.098	8231.49	-6.335	-2.925	-8.035	-3.725	A	ANJ-B-2-462
209.618	8235.69	-7.14	-3.676	-8.84	-4.476	A	ANJ-B-2-463
210.138	8239.84	-6.909	-3.88	-8.609	-4.68	A	ANJ-B-2-464
210.659	8243.98	-5.689	-4.204	-7.389	-5.004	A	ANJ-B-2-465
211.179	8248.17	-5.852	-3.961	-7.552	-4.761	A	ANJ-B-2-466
211.699	8252.41	-7.145	-3.691	-8.845	-4.491	A	ANJ-B-2-467
212.22	8256.67	-7.135	-3.998	-8.835	-4.798	A	ANJ-B-2-468
212.74	8260.89	-7.125	-5.254	-8.825	-6.054	A	ANJ-B-2-469
213.26	8265.04	-6	-4.736	-7.7	-5.536	A	ANJ-B-2-470
213.78	8269.12	-6.98	-5.378	-8.68	-6.178	A	ANJ-B-2-471
214.301	8273.16	-7.005	-5.786	-8.705	-6.586	A	ANJ-B-2-472
214.821	8277.21	-6.402	-5.201	-8.102	-6.001	A	ANJ-B-2-473
215.341	8281.32	-7.308	-4.321	-9.008	-5.121	A	ANJ-B-2-474
215.862	8285.48	-7.589	-4.521	-9.289	-5.321	A	ANJ-B-2-475
216.382	8289.65	-8.34	-5.744	-10.04	-6.544	A	ANJ-B-2-476
216.902	8293.79	-8.39	-6.049	-10.09	-6.849	A	ANJ-B-2-477
217.423	8297.89	-7.006	-5.142	-8.706	-5.942	A	ANJ-B-2-478
217.943	8302.07	-5.964	-3.896	-7.664	-4.696	A	ANJ-B-2-479
218.463	8306.56	-6.438	-4.048	-8.138	-4.848	A	ANJ-B-2-480
218.984	8311.54	-8.358	-5.007	-10.058	-5.807	A	ANJ-B-2-481
219.504	8317.18	-8.064	-4.93	-9.764	-5.73	A	ANJ-B-2-482
220.024	8323.44	-8.998	-5.79	-10.698	-6.59	A	ANJ-B-2-483
220.545	8330.21	-7.919	-4.903	-9.619	-5.703	A	ANJ-B-2-484
221.065	8337.53	-7	-5.101	-8.7	-5.901	A	ANJ-B-2-485
221.585	8345.01	-5.716	-3.739	-7.416	-4.539	A	ANJ-B-2-486
222.106	8352.6	-5.186	-2.967	-6.886	-3.767	A	ANJ-B-2-487
222.626	8360.12	-4.885	-2.705	-6.585	-3.505	A	ANJ-B-2-488
223.146	8367.39	-5.292	-2.323	-6.992	-3.123	A	ANJ-B-2-489
223.667	8374.29	-5.877	-3.678	-7.577	-4.478	A	ANJ-B-2-490
224.187	8380.81	-6.204	-3.827	-7.904	-4.627	A	ANJ-B-2-491
224.707	8386.95	-7.8	-4.532	-9.5	-5.332	A	ANJ-B-2-492
225.228	8392.72	-6.372	-4.24	-8.072	-5.04	A	ANJ-B-2-493
225.748	8398.16	-6.087	-3.863	-7.787	-4.663	A	ANJ-B-2-494
226.268	8403.36	-6.782	-4.233	-8.482	-5.033	A	ANJ-B-2-495
226.789	8408.42	-6.716	-4.449	-8.416	-5.249	A	ANJ-B-2-496
227.309	8413.43	-6.09	-3.893	-7.79	-4.693	A	ANJ-B-2-497
227.829	8418.45	-5.71	-3.593	-7.41	-4.393	A	ANJ-B-2-498
228.35	8423.49	-6.19	-4.484	-7.89	-5.284	A	ANJ-B-2-499
228.87	8428.55	-5.691	-4.687	-7.391	-5.487	A	ANJ-B-2-500
229.39	8433.66	-5.854	-3.904	-7.554	-4.704	A	ANJ-B-2-501
229.911	8438.78	-6.318	-3.729	-8.018	-4.529	A	ANJ-B-2-502
230.431	8443.88	-5.464	-2.856	-7.164	-3.656	A	ANJ-B-2-503
230.951	8448.93	-5.519	-3.418	-7.219	-4.218	A	ANJ-B-2-504
231.472	8453.89	-5.185	-2.728	-6.885	-3.528	A	ANJ-B-2-505
231.992	8458.8	-5.97	-3.2	-7.67	-4	A	ANJ-B-2-506
232.512	8463.68	-6.249	-3.494	-7.949	-4.294	A	ANJ-B-2-507
233.033	8468.58	-5.41	-3.758	-7.11	-4.558	A	ANJ-B-2-508
233.553	8473.52	-6.185	-4.132	-7.885	-4.932	A	ANJ-B-2-509
234.073	8478.5	-6.257	-4.13	-7.957	-4.93	A	ANJ-B-2-510
234.593	8483.5	-6.263	-4.353	-7.963	-5.153	A	ANJ-B-2-511
235.114	8488.52	-5.842	-3.992	-7.542	-4.792	A	ANJ-B-2-512
235.634	8493.53	-5.873	-3.743	-7.573	-4.543	A	ANJ-B-2-513
236.154	8498.55	-7.072	-4.215	-8.772	-5.015	A	ANJ-B-2-514
236.675	8503.58	-7.118	-4.33	-8.818	-5.13	A	ANJ-B-2-515
237.195	8508.71	-6.663	-4.041	-8.363	-4.841	A	ANJ-B-2-516
237.715	8513.76	-6.925	-4.506	-8.625	-5.306	A	ANJ-B-2-517
238.236	8518.81	-5.677	-4.403	-7.377	-5.203	A	ANJ-B-2-518
238.756	8523.86	-5.07	-4.864	-6.77	-5.664	A	ANJ-B-2-519
239.276	8528.9	-4.497	-3.476	-6.197	-4.276	A	ANJ-B-2-520
239.797	8533.92	-6.229	-3.975	-7.929	-4.775	A	ANJ-B-2-521
240.317	8538.88	-6.682	-3.978	-8.382	-4.778	A	ANJ-B-2-522
240.837	8543.75	-6.685	-3.725	-8.385	-4.525	A	ANJ-B-2-523
241.358	8548.5	-6.857	-4.225	-8.557	-5.025	A	ANJ-B-2-524
241.878	8553.15	-6.504	-4.382	-8.204	-5.182	A	ANJ-B-2-525
242.398	8557.76	-7.127	-4.494	-8.827	-5.294	A	ANJ-B-2-526
242.919	8562.37	-5.584	-3.331	-7.284	-4.131	A	ANJ-B-2-527
243.439	8567.05	-6.91	-4.485	-8.61	-5.285	A	ANJ-B-2-528
243.959	8571.77	-6.845	-4.866	-8.545	-5.666	A	ANJ-B-2-529
244.48	8576.48	-6.156	-4.255	-7.856	-5.055	A	ANJ-B-2-530
245	8581.15	-6.723	-6.139	-8.423	-6.939	A	ANJ-B-2-531
245.52	8585.74	-6.179	-4.427	-7.879	-5.227	A	ANJ-B-2-532
246.041	8590.23	-5.887	-2.666	-7.587	-3.466	A	ANJ-B-2-533
246.561	8594.64	-6.453	-3.825	-8.153	-4.625	A	ANJ-B-2-534
247.081	8598.96	-7.009	-3.895	-8.709	-4.695	A	ANJ-B-2-535
247.602	8603.18	-6.68	-3.062	-8.38	-3.862	A	ANJ-B-2-536
248.122	8607.35	-8.42	-4.484	-10.12	-5.284	A	ANJ-B-2-537
248.642	8611.48	-7.296	-3.987	-8.996	-4.787	A	ANJ-B-2-538
249.163	8615.61	-7.375	-4.353	-9.075	-5.153	A	ANJ-B-2-539
249.683	8619.74	-5.296	-3.943	-6.996	-4.743	A	ANJ-B-2-540
250.203	8623.86	-5.834	-3.023	-7.534	-3.823	A	ANJ-B-2-541
250.724	8627.94	-6.006	-3.46	-7.706	-4.26	A	ANJ-B-2-542
251.244	8631.97	-6.526	-3.983	-8.226	-4.783	A	ANJ-B-2-543
251.764	8635.93	-6.078	-4.69	-7.778	-5.49	A	ANJ-B-2-544
252.285	8639.82	-7.039	-5.525	-7.039	-5.525	C	ANJ-B-2-545
252.805	8643.61	-6.336	-4.62	-6.336	-4.62	C	ANJ-B-2-546
253.325	8647.38	-7.56	-5.263	-7.56	-5.263	C	ANJ-B-2-547
253.846	8651.01	-7.214	-4.959	-7.214	-4.959	C	ANJ-B-2-548
254.366	8654.64	-9.249	-5.684	-9.249	-5.684	C	ANJ-B-2-549
254.886	8658.34	-8.145	-4.496	-8.145	-4.496	C	ANJ-B-2-550
255.407	8662.14	-7.564	-3.941	-7.564	-3.941	C	ANJ-B-2-551
255.927	8665.97	-7.534	-4.896	-7.534	-4.896	C	ANJ-B-2-552
256.447	8669.72	-7.716	-4.728	-7.716	-4.728	C	ANJ-B-2-553
256.967	8673.24	-8.255	-5.036	-8.255	-5.036	C	ANJ-B-2-554
257.488	8676.45	-7.478	-4.361	-9.178	-5.161	A	ANJ-B-2-555
258.008	8679.41	-9.709	-6.336	-11.409	-7.136	A	ANJ-B-2-556
258.528	8682.27	-10.063	-5.454	-11.763	-6.254	A	ANJ-B-2-557
259.049	8685.13	-9.886	-5.342	-11.586	-6.142	A	ANJ-B-2-558
259.569	8688.08	-9.911	-6.546	-11.611	-7.346	A	ANJ-B-2-559
260.089	8691.01	-10.098	-6.541	-11.798	-7.341	A	ANJ-B-2-560
260.61	8693.8	-9.7	-5.207	-11.4	-6.007	A	ANJ-B-2-561
261.13	8696.31	-10.143	-5.522	-11.843	-6.322	A	ANJ-B-2-562
261.65	8698.46	-9.779	-6.76	-11.479	-7.56	A	ANJ-B-2-563
262.171	8700.25	-8.462	-6.523	-10.162	-7.323	A	ANJ-B-2-564
262.691	8701.69	-8.737	-6.197	-10.437	-6.997	A	ANJ-B-2-565
263.211	8702.78	-7.905	-5.211	-9.605	-6.011	A	ANJ-B-2-566
263.732	8703.58	-7.885	-4.913	-9.585	-5.713	A	ANJ-B-2-567
264.252	8704.13	-7.892	-4.5	-9.592	-5.3	A	ANJ-B-2-568
264.772	8704.51	-8.493	-5.278	-10.193	-6.078	A	ANJ-B-2-569
265.293	8704.79	-8.026	-5.449	-9.726	-6.249	A	ANJ-B-2-570
265.813	8705.03	-7.342	-4.94	-9.042	-5.74	A	ANJ-B-2-571
266.333	8705.32	-7.869	-4.641	-9.569	-5.441	A	ANJ-B-2-572
266.854	8705.7	-8.629	-4.632	-10.329	-5.432	A	ANJ-B-2-573
267.374	8706.26	-7.297	-5.307	-8.997	-6.107	A	ANJ-B-2-574
267.894	8706.95	-7.722	-6.081	-9.422	-6.881	A	ANJ-B-2-575
268.415	8707.71	-7.425	-5.334	-9.125	-6.134	A	ANJ-B-2-576
268.935	8708.44	-7.624	-4.723	-9.324	-5.523	A	ANJ-B-2-577
269.455	8709.12	-8.134	-4.877	-9.834	-5.677	A	ANJ-B-2-578
269.976	8709.82	-8.234	-4.424	-9.934	-5.224	A	ANJ-B-2-579
270.496	8710.71	-7.841	-4.446	-9.541	-5.246	A	ANJ-B-2-580
271.016	8711.94	-8.151	-4.528	-9.851	-5.328	A	ANJ-B-2-581
271.537	8713.63	-7.874	-4.096	-9.574	-4.896	A	ANJ-B-2-582
272.057	8715.72	-7.742	-4.247	-9.442	-5.047	A	ANJ-B-2-583
272.577	8718.13	-7.946	-4.333	-9.646	-5.133	A	ANJ-B-2-584
273.098	8720.77	-8.003	-3.885	-9.703	-4.685	A	ANJ-B-2-585
273.618	8723.57	-8.446	-4.124	-10.146	-4.924	A	ANJ-B-2-586
274.138	8726.48	-8.256	-4.254	-9.956	-5.054	A	ANJ-B-2-587
274.659	8729.47	-8.021	-4.538	-9.721	-5.338	A	ANJ-B-2-588
275.179	8732.48	-8.174	-5.394	-9.874	-6.194	A	ANJ-B-2-589
275.699	8735.54	-8.473	-5.606	-10.173	-6.406	A	ANJ-B-2-590
276.22	8738.67	-8.135	-5.073	-9.835	-5.873	A	ANJ-B-2-591
276.74	8741.96	-8.212	-5.194	-9.912	-5.994	A	ANJ-B-2-592
277.26	8745.43	-8.707	-5.279	-10.407	-6.079	A	ANJ-B-2-593
277.78	8749.07	-7.98	-4.538	-9.68	-5.338	A	ANJ-B-2-594
278.301	8752.76	-8.171	-4.257	-9.871	-5.057	A	ANJ-B-2-595
278.821	8756.36	-8.89	-4.712	-10.59	-5.512	A	ANJ-B-2-596
279.341	8759.79	-6.56	-3.341	-8.26	-4.141	A	ANJ-B-2-597
279.862	8763.17	-9.008	-4.265	-10.708	-5.065	A	ANJ-B-2-598
280.382	8766.8	-7.432	-4.359	-9.132	-5.159	A	ANJ-B-2-599
280.902	8770.98	-9.499	-6.276	-11.199	-7.076	A	ANJ-B-2-600
281.423	8775.95	-8.356	-6.691	-10.056	-7.491	A	ANJ-B-2-601
281.943	8781.57	-8.811	-6.759	-10.511	-7.559	A	ANJ-B-2-602
282.463	8787.52	-8.681	-6.419	-10.381	-7.219	A	ANJ-B-2-603
282.984	8793.5	-8.87	-6.363	-10.57	-7.163	A	ANJ-B-2-604
283.504	8799.25	-8.64	-5.027	-10.34	-5.827	A	ANJ-B-2-605
284.024	8804.72	-9.012	-5.715	-10.712	-6.515	A	ANJ-B-2-606
284.545	8809.96	-7.358	-4.724	-9.058	-5.524	A	ANJ-B-2-607
285.065	8815.08	-8.161	-5.063	-9.861	-5.863	A	ANJ-B-2-608
285.585	8819.92	-9.133	-5.519	-10.833	-6.319	A	ANJ-B-2-609
286.106	8824.65	-9.221	-5.587	-10.921	-6.387	A	ANJ-B-2-610
286.626	8829.3	-8.738	-4.979	-10.438	-5.779	A	ANJ-B-2-611
287.146	8833.94	-8.736	-4.988	-10.436	-5.788	A	ANJ-B-2-612
287.667	8838.59	-8.391	-5.147	-10.091	-5.947	A	ANJ-B-2-613
288.187	8843.26	-7.511	-5.061	-9.211	-5.861	A	ANJ-B-2-614
288.707	8847.96	-9.115	-6.263	-10.815	-7.063	A	ANJ-B-2-615
289.228	8852.67	-9.039	-6.588	-10.739	-7.388	A	ANJ-B-2-616
289.748	8857.4	-9.079	-6.868	-10.779	-7.668	A	ANJ-B-2-617
290.268	8862.12	-9.066	-6.549	-10.766	-7.349	A	ANJ-B-2-618
290.789	8866.82	-8.262	-5.279	-9.962	-6.079	A	ANJ-B-2-619
291.309	8871.47	-9.304	-5.392	-11.004	-6.192	A	ANJ-B-2-620
291.829	8876.08	-8.369	-4.541	-10.069	-5.341	A	ANJ-B-2-621
292.35	8880.67	-9.077	-4.826	-10.777	-5.626	A	ANJ-B-2-622
292.87	8885.29	-9.186	-5.175	-10.886	-5.975	A	ANJ-B-2-623
293.39	8889.93	-8.882	-4.887	-10.582	-5.687	A	ANJ-B-2-624
293.911	8894.61	-7.733	-4.768	-9.433	-5.568	A	ANJ-B-2-625
294.431	8899.28	-8.577	-5.108	-10.277	-5.908	A	ANJ-B-2-626
294.951	8903.92	-8.458	-4.692	-10.158	-5.492	A	ANJ-B-2-627
295.472	8908.52	-8.338	-4.674	-10.038	-5.474	A	ANJ-B-2-628
295.992	8913.07	-9.599	-5.537	-11.299	-6.337	A	ANJ-B-2-629
296.512	8917.59	-9.548	-5.516	-11.248	-6.316	A	ANJ-B-2-630
297.033	8922.09	-9.097	-7.032	-10.797	-7.832	A	ANJ-B-2-631
297.553	8926.6	-9.266	-7.533	-10.966	-8.333	A	ANJ-B-2-632
298.073	8931.1	-9.182	-6.812	-10.882	-7.612	A	ANJ-B-2-633
298.593	8935.61	-9.384	-6.619	-11.084	-7.419	A	ANJ-B-2-634
299.114	8940.1	-8.857	-6.305	-10.557	-7.105	A	ANJ-B-2-635
299.634	8944.6	-8.84	-6.395	-10.54	-7.195	A	ANJ-B-2-636
300.154	8949.09	-7.98	-5.789	-9.68	-6.589	A	ANJ-B-2-637
300.675	8953.59	-8.188	-5.616	-9.888	-6.416	A	ANJ-B-2-638
301.195	8958.18	-9.028	-5.384	-10.728	-6.184	A	ANJ-B-2-639
301.715	8962.7	-9.207	-5.441	-10.907	-6.241	A	ANJ-B-2-640
302.236	8967.26	-9.06	-5.588	-10.76	-6.388	A	ANJ-B-2-641
302.756	8971.89	-9.086	-5.68	-10.786	-6.48	A	ANJ-B-2-642
303.276	8976.61	-8.981	-6.027	-10.681	-6.827	A	ANJ-B-2-643
303.797	8981.39	-9.958	-6.399	-11.658	-7.199	A	ANJ-B-2-644
304.317	8986.17	-8.289	-5.99	-9.989	-6.79	A	ANJ-B-2-645
304.837	8990.87	-10.602	-6.887	-12.302	-7.687	A	ANJ-B-2-646
305.358	8995.43	-8.901	-4.776	-10.601	-5.576	A	ANJ-B-2-647
305.878	8999.88	-9.68	-5.764	-11.38	-6.564	A	ANJ-B-2-648
306.398	9004.31	-9.082	-5.761	-10.782	-6.561	A	ANJ-B-2-649
306.919	9008.79	-8.661	-5.536	-10.361	-6.336	A	ANJ-B-2-650
307.439	9013.39	-8.025	-5.725	-9.725	-6.525	A	ANJ-B-2-651
307.959	9018.09	-8.714	-6.272	-10.414	-7.072	A	ANJ-B-2-652
308.48	9022.81	-8.712	-5.212	-10.412	-6.012	A	ANJ-B-2-653
309	9027.47	-8.996	-5.363	-10.696	-6.163	A	ANJ-B-2-654
Depth	Age model	d13C raw (‰ VPDB)	d18O raw (‰ VPDB)	d13C (‰ VPDB)**	d18O (‰ VPDB)**	Mineralogy	Sample ID
0	183.081	-4.68969	-5.14168	-5.96469	-5.74168	A-C	MAJ-5-001
0.314721	183.746	-4.5412	-5.40433	-5.8162	-6.00433	A-C	MAJ-5-002
0.629442	183.877	-4.30564	-5.53702	-5.58064	-6.13702	A-C	MAJ-5-003
0.944162	185.348	-4.11541	-5.35876	-5.39041	-5.95876	A-C	MAJ-5-004
1.25888	190.031	-4.12057	-4.73669	-5.39557	-5.33669	A-C	MAJ-5-005
1.5736	199.8	-3.92222	-4.43938	-5.19722	-5.03938	A-C	MAJ-5-006
1.88832	216.528	-3.12797	-3.3927	-4.40297	-3.9927	A-C	MAJ-5-007
2.20305	241.872	-5.98453	-3.39709	-7.25953	-3.99709	A-C	MAJ-5-008
2.51777	274.792	-7.65896	-5.095	-7.65896	-5.095	C	MAJ-5-009
2.83249	312.405	-7.65548	-4.93833	-7.65548	-4.93833	C	MAJ-5-010
3.14721	351.79	-7.93907	-5.49185	-7.93907	-5.49185	C	MAJ-5-011
3.46193	390.027	-8.16699	-5.44733	-8.16699	-5.44733	C	MAJ-5-012
3.77665	424.196	-7.9318	-4.55972	-7.9318	-4.55972	C	MAJ-5-013
4.09137	451.396	-7.84879	-5.03696	-7.84879	-5.03696	C	MAJ-5-014
4.40609	470.276	-7.52678	-5.75329	-7.52678	-5.75329	C	MAJ-5-015
4.72081	482.186	-8.56044	-6.3348	-8.56044	-6.3348	C	MAJ-5-016
5.03553	488.746	-8.95016	-5.97501	-8.95016	-5.97501	C	MAJ-5-017
5.35025	491.577	-8.24224	-5.67584	-8.24224	-5.67584	C	MAJ-5-018
5.66497	492.298	-8.2048	-5.71575	-8.2048	-5.71575	C	MAJ-5-019
5.9797	492.529	-8.57568	-6.04059	-8.57568	-6.04059	C	MAJ-5-020
6.29442	493.632	-8.26175	-5.74706	-8.26175	-5.74706	C	MAJ-5-021
6.60914	495.703	-6.72135	-5.37961	-6.72135	-5.37961	C	MAJ-5-022
6.92386	498.457	-6.46319	-4.96283	-6.46319	-4.96283	C	MAJ-5-023
7.23858	501.611	-6.73387	-5.80215	-6.73387	-5.80215	C	MAJ-5-024
7.5533	504.879	-7.95301	-7.96847	-7.95301	-7.96847	C	MAJ-5-025
7.86802	507.975	-7.57444	-7.39708	-7.57444	-7.39708	C	MAJ-5-026
8.18274	510.63	-8.44284	-6.35257	-8.44284	-6.35257	C	MAJ-5-027
8.49746	512.806	-8.6	-5	-8.6	-5	C	MAJ-5-028
8.81218	514.653	-8.49512	-4.6777	-8.49512	-4.6777	C	MAJ-5-029
9.1269	516.329	-8.51051	-5.26224	-8.51051	-5.26224	C	MAJ-5-030
9.44162	517.988	-8.30307	-5.71901	-8.30307	-5.71901	C	MAJ-5-031
9.75635	519.787	-7.55407	-5.26923	-7.55407	-5.26923	C	MAJ-5-032
10.0711	521.882	-7.45651	-5.66061	-7.45651	-5.66061	C	MAJ-5-033
10.3858	524.372	-7.23347	-5.52176	-7.23347	-5.52176	C	MAJ-5-034
10.7005	527.237	-7.35699	-7.12333	-7.35699	-7.12333	C	MAJ-5-035
11.0152	530.441	-6.85001	-6.37938	-6.85001	-6.37938	C	MAJ-5-036
11.3299	533.949	-7.07174	-7.19347	-7.07174	-7.19347	C	MAJ-5-037
11.6447	537.727	-6.88528	-6.82512	-6.88528	-6.82512	C	MAJ-5-038
11.9594	541.739	-7.26572	-6.11118	-7.26572	-6.11118	C	MAJ-5-039
12.2741	545.962	-6.64845	-6.11495	-6.64845	-6.11495	C	MAJ-5-040
12.5888	550.436	-6.38232	-5.84637	-6.38232	-5.84637	C	MAJ-5-041
12.9036	555.227	-6.20027	-6.25016	-6.20027	-6.25016	C	MAJ-5-042
13.2183	560.4	-6.33506	-6.08956	-6.33506	-6.08956	C	MAJ-5-043
13.533	566.018	-6.46898	-6.33041	-6.46898	-6.33041	C	MAJ-5-044
13.8477	572.148	-6.5361	-6.37001	-6.5361	-6.37001	C	MAJ-5-045
14.1624	578.846	-5.74424	-5.66652	-5.74424	-5.66652	C	MAJ-5-046
14.4772	586	-4.76569	-5.30961	-4.76569	-5.30961	C	MAJ-5-047
14.7919	593.335	-4.9151	-5.38132	-4.9151	-5.38132	C	MAJ-5-048
15.1066	600.569	-6.03833	-5.60857	-6.03833	-5.60857	C	MAJ-5-049
15.4213	607.422	-6.4177	-5.88051	-6.4177	-5.88051	C	MAJ-5-050
15.736	613.612	-6.47872	-6.27764	-6.47872	-6.27764	C	MAJ-5-051
16.0508	618.858	-6.36044	-6.3565	-6.36044	-6.3565	C	MAJ-5-052
16.3655	623.019	-6.14442	-6.64656	-6.14442	-6.64656	C	MAJ-5-053
16.6802	626.299	-5.04216	-5.18158	-5.04216	-5.18158	C	MAJ-5-054
16.9949	628.956	-5.5972	-5.9915	-5.5972	-5.9915	C	MAJ-5-055
17.3096	631.249	-6.63378	-5.93586	-6.63378	-5.93586	C	MAJ-5-056
17.6244	633.435	-5.97935	-6.24865	-5.97935	-6.24865	C	MAJ-5-057
17.9391	635.773	-5.25791	-6.83596	-5.25791	-6.83596	C	MAJ-5-058
18.2538	638.491	-4.78018	-4.74789	-4.78018	-4.74789	C	MAJ-5-059
18.5685	641.609	-5.83628	-5.0302	-5.83628	-5.0302	C	MAJ-5-060
18.8832	645.056	-6.28228	-5.17972	-6.28228	-5.17972	C	MAJ-5-061
19.198	648.758	-6.49356	-5.73694	-6.49356	-5.73694	C	MAJ-5-062
19.5127	652.643	-6.61142	-5.95913	-6.61142	-5.95913	C	MAJ-5-063
19.8274	656.638	-6.29033	-5.92902	-6.29033	-5.92902	C	MAJ-5-064
20.1421	660.673	-6.02438	-5.56548	-6.02438	-5.56548	C	MAJ-5-065
20.4569	664.729	-5.79051	-5.43874	-5.79051	-5.43874	C	MAJ-5-066
20.7716	668.847	-5.14262	-4.94876	-5.14262	-4.94876	C	MAJ-5-067
21.0863	673.072	-6.25123	-5.39903	-6.25123	-5.39903	C	MAJ-5-068
21.401	677.447	-6.08328	-5.5602	-6.08328	-5.5602	C	MAJ-5-069
21.7157	682.018	-6.13585	-5.88923	-6.13585	-5.88923	C	MAJ-5-070
22.0305	686.828	-5.53587	-5.68857	-5.53587	-5.68857	C	MAJ-5-071
22.3452	691.907	-5.17189	-5.44595	-5.17189	-5.44595	C	MAJ-5-072
22.6599	697.242	-5.44937	-5.60581	-5.44937	-5.60581	C	MAJ-5-073
22.9746	702.813	-5.26503	-5.41908	-5.26503	-5.41908	C	MAJ-5-074
23.2893	708.598	-5.27391	-4.91615	-5.27391	-4.91615	C	MAJ-5-075
23.6041	714.577	-4.84346	-3.81894	-4.84346	-3.81894	C	MAJ-5-076
23.9188	720.728	-4.6	-3.3	-4.6	-3.3	C	MAJ-5-077
24.2335	727.026	-4.3	-3.7	-4.3	-3.7	C	MAJ-5-078
24.5482	733.406	-4.4	-3.8	-4.4	-3.8	C	MAJ-5-079
24.8629	739.781	-4.6	-4.4	-4.6	-4.4	C	MAJ-5-080
25.1777	746.066	-4.7	-5.2	-4.7	-5.2	C	MAJ-5-081
25.4924	752.173	-4.7	-5.5	-4.7	-5.5	C	MAJ-5-082
25.8071	758.017	-5	-5.3	-5	-5.3	C	MAJ-5-083
26.1218	763.512	-5.3	-5.7	-5.3	-5.7	C	MAJ-5-084
26.4365	768.645	-5.5	-6.7	-5.5	-6.7	C	MAJ-5-085
26.7513	773.496	-5.5	-6.7	-5.5	-6.7	C	MAJ-5-086
27.066	778.153	-5.4	-6.6	-5.4	-6.6	C	MAJ-5-087
27.3807	782.702	-5.6	-6.7	-5.6	-6.7	C	MAJ-5-088
27.6954	787.23	-5.6	-6.7	-5.6	-6.7	C	MAJ-5-089
28.0102	791.826	-5.8	-7	-5.8	-7	C	MAJ-5-090
28.3249	796.562	-5.1	-5.8	-5.1	-5.8	C	MAJ-5-091
28.6396	801.453	-4.7	-5.5	-4.7	-5.5	C	MAJ-5-092
28.9543	806.507	-4.4	-5.1	-4.4	-5.1	C	MAJ-5-093
29.269	811.727	-4.6	-4.7	-4.6	-4.7	C	MAJ-5-094
29.5838	817.12	-5	-5.8	-5	-5.8	C	MAJ-5-095
29.8985	822.689	-5.2	-5.8	-5.2	-5.8	C	MAJ-5-096
30.2132	828.438	-5.3	-5.3	-5.3	-5.3	C	MAJ-5-097
30.5279	834.363	-5.1	-5.5	-5.1	-5.5	C	MAJ-5-098
30.8426	840.45	-4.4	-5	-4.4	-5	C	MAJ-5-099
31.1574	846.686	-4.4	-5.2	-4.4	-5.2	C	MAJ-5-100
31.4721	853.059	-4.1	-6	-4.1	-6	C	MAJ-5-101
31.7868	859.556	-3.4	-5.5	-3.4	-5.5	C	MAJ-5-102
32.1015	866.165	-2.3	-5	-2.3	-5	C	MAJ-5-103
32.4162	872.871	-1.9	-4.9	-1.9	-4.9	C	MAJ-5-104
32.731	879.662	-2.2	-5.4	-2.2	-5.4	C	MAJ-5-105
33.0457	886.522	-1.8	-5.8	-1.8	-5.8	C	MAJ-5-106
33.3604	893.437	-2.9	-6.2	-2.9	-6.2	C	MAJ-5-107
33.6751	900.393	-2.8	-5.7	-2.8	-5.7	C	MAJ-5-108
33.9898	907.376	-3.1	-5.6	-3.1	-5.6	C	MAJ-5-109
34.3046	914.361	-2.5	-6.6	-2.5	-6.6	C	MAJ-5-110
34.6193	921.281	-2.6	-5.7	-2.6	-5.7	C	MAJ-5-111
34.934	928.058	-2.8	-5.5	-2.8	-5.5	C	MAJ-5-112
35.2487	934.612	-2.3	-5.6	-2.3	-5.6	C	MAJ-5-113
35.5635	940.864	-2.1	-5.6	-2.1	-5.6	C	MAJ-5-114
35.8782	946.736	-2	-5.6	-2	-5.6	C	MAJ-5-115
36.1929	952.156	-2.8	-5.6	-2.8	-5.6	C	MAJ-5-116
36.5076	957.182	-2.8	-5.8	-2.8	-5.8	C	MAJ-5-117
36.8223	961.962	-3.1	-5.4	-3.1	-5.4	C	MAJ-5-118
37.1371	966.647	-3.2	-5.7	-3.2	-5.7	C	MAJ-5-119
37.4518	971.391	-2.6	-4.4	-2.6	-4.4	C	MAJ-5-120
37.7665	976.343	-2.6	-5.8	-2.6	-5.8	C	MAJ-5-121
38.0812	981.655	-2.7	-5.6	-2.7	-5.6	C	MAJ-5-122
38.3959	987.405	-2.4	-4.7	-2.4	-4.7	C	MAJ-5-123
38.7107	993.529	-2.3	-5.3	-2.3	-5.3	C	MAJ-5-124
39.0254	999.948	-2	-5	-2	-5	C	MAJ-5-125
39.3401	1006.59	-1.4	-5.2	-1.4	-5.2	C	MAJ-5-126
39.6548	1013.36	-1	-6.4	-1	-6.4	C	MAJ-5-127
39.9695	1020.2	-1.5	-5.5	-1.5	-5.5	C	MAJ-5-128
40.2843	1027.03	-1.5	-5.5	-1.5	-5.5	C	MAJ-5-129
40.599	1033.84	-1.1	-6	-1.1	-6	C	MAJ-5-130
40.9137	1040.66	-0.9	-5.2	-0.9	-5.2	C	MAJ-5-131
41.2284	1047.51	-0.9	-5.6	-0.9	-5.6	C	MAJ-5-132
41.5431	1054.38	-0.7	-4.2	-0.7	-4.2	C	MAJ-5-133
41.8579	1061.31	-0.6	-4.1	-0.6	-4.1	C	MAJ-5-134
42.1726	1068.31	-0.1	-5	-0.1	-5	C	MAJ-5-135
42.4873	1075.39	0	-4.9	0	-4.9	C	MAJ-5-136
42.802	1082.54	-0.1	-5.4	-0.1	-5.4	C	MAJ-5-137
43.1168	1089.76	2.6	-2.7	2.6	-2.7	C	MAJ-5-138
43.4315	1097.07	0.9	-5.3	0.9	-5.3	C	MAJ-5-139
43.7462	1104.45	1.2	-4	1.2	-4	C	MAJ-5-140
44.0609	1111.91	0.1	-4.8	0.1	-4.8	C	MAJ-5-141
44.3756	1119.41	-0.1	-5.7	-0.1	-5.7	C	MAJ-5-142
44.6904	1126.89	-0.1	-8.8	-0.1	-8.8	C	MAJ-5-143
45.0051	1134.22	0.7	-6.7	0.7	-6.7	C	MAJ-5-144
45.3198	1141.33	1.4	-4.5	1.4	-4.5	C	MAJ-5-145
45.6345	1148.11	2.1	-3.5	2.1	-3.5	C	MAJ-5-146
45.9492	1154.47	0.4	-5	0.4	-5	C	MAJ-5-147
46.264	1160.33	-0.2	-5.6	-0.2	-5.6	C	MAJ-5-148
46.5787	1165.8	0.3	-5.6	0.3	-5.6	C	MAJ-5-149
46.8934	1171.05	-0.1	-5.7	-0.1	-5.7	C	MAJ-5-150
47.2081	1176.24	0.2	-5.6	0.2	-5.6	C	MAJ-5-151
47.5228	1181.54	-0.2	-5.7	-0.2	-5.7	C	MAJ-5-152
47.8376	1187.12	-0.2	-5.4	-0.2	-5.4	C	MAJ-5-153
48.1523	1193.14	0.1	-5.3	0.1	-5.3	C	MAJ-5-154
48.467	1199.71	0.2	-4.8	0.2	-4.8	C	MAJ-5-155
48.7817	1206.83	0.3243	-4.14128	0.3243	-4.14128	C	MAJ-5-156
49.0964	1214.52	0.8775	-4.00283	0.8775	-4.00283	C	MAJ-5-157
49.4112	1222.79	0.9525	-3.73993	0.9525	-3.73993	C	MAJ-5-158
49.7259	1231.67	0.4623	-4.21547	0.4623	-4.21547	C	MAJ-5-159
50.0406	1241.16	0.4152	-5.23632	0.4152	-5.23632	C	MAJ-5-160
50.3553	1251.23	0.5449	-5.23353	0.5449	-5.23353	C	MAJ-5-161
50.6701	1261.72	0.0721	-5.58716	0.0721	-5.58716	C	MAJ-5-162
50.9848	1272.47	0.1136	-5.61904	0.1136	-5.61904	C	MAJ-5-163
51.2995	1283.28	0.6148	-5.8692	0.6148	-5.8692	C	MAJ-5-164
51.6142	1294	0.6317	-6.67807	0.6317	-6.67807	C	MAJ-5-165
51.9289	1304.43	0.2821	-6.31162	0.2821	-6.31162	C	MAJ-5-166
52.2437	1314.44	0.6476	-4.29537	0.6476	-4.29537	C	MAJ-5-167
52.5584	1324.19	0.4108	-5.16999	0.4108	-5.16999	C	MAJ-5-168
52.8731	1333.96	0.2429	-5.46002	0.2429	-5.46002	C	MAJ-5-169
53.1878	1344.05	0.4694	-5.44656	0.4694	-5.44656	C	MAJ-5-170
53.5025	1354.75	0.2555	-6.10219	0.2555	-6.10219	C	MAJ-5-171
53.8173	1366.36	-0.0378	-5.63614	-0.0378	-5.63614	C	MAJ-5-172
54.132	1379.16	-0.2208	-5.44391	-0.2208	-5.44391	C	MAJ-5-173
54.4467	1393.12	-0.2047	-4.91759	-0.2047	-4.91759	C	MAJ-5-174
54.7614	1407.85	-0.9144	-5.28246	-0.9144	-5.28246	C	MAJ-5-175
55.0761	1422.89	-1.3408	-6.15673	-1.3408	-6.15673	C	MAJ-5-176
55.3909	1437.84	-1.3344	-4.82865	-1.3344	-4.82865	C	MAJ-5-177
55.7056	1452.25	-1.3918	-4.87533	-1.3918	-4.87533	C	MAJ-5-178
56.0203	1465.69	-1.0492	-5.35388	-1.0492	-5.35388	C	MAJ-5-179
56.335	1477.88	-0.4063	-5.93695	-0.4063	-5.93695	C	MAJ-5-180
56.6497	1489.04	-1.3033	-5.90889	-1.3033	-5.90889	C	MAJ-5-181
56.9645	1499.46	-2.4291	-4.94197	-2.4291	-4.94197	C	MAJ-5-182
57.2792	1509.47	-1.9104	-4.20941	-1.9104	-4.20941	C	MAJ-5-183
57.5939	1519.38	0.0369	-3.14289	0.0369	-3.14289	C	MAJ-5-184
57.9086	1529.5	-0.2718	-3.16724	-0.2718	-3.16724	C	MAJ-5-185
58.2234	1540.1	0.8435	-3.16739	0.8435	-3.16739	C	MAJ-5-186
58.5381	1551.15	1.3927	-1.9197	1.3927	-1.9197	C	MAJ-5-187
58.8528	1562.4	0.4266	-2.06142	0.4266	-2.06142	C	MAJ-5-188
59.1675	1573.63	0.633	-1.89995	0.633	-1.89995	C	MAJ-5-189
59.4822	1584.61	0.7483	-2.77923	0.7483	-2.77923	C	MAJ-5-190
59.797	1595.09	0.6584	-3.58426	0.6584	-3.58426	C	MAJ-5-191
60.1117	1604.85	-0.4241	-2.80876	-0.4241	-2.80876	C	MAJ-5-192
60.4264	1613.83	0.2557	-3.4397	0.2557	-3.4397	C	MAJ-5-193
60.7411	1622.23	-0.0677	-4.63201	-0.0677	-4.63201	C	MAJ-5-194
61.0558	1630.26	-1.6198	-3.75647	-1.6198	-3.75647	C	MAJ-5-195
61.3706	1638.15	-5.8853	-3.78833	-5.8853	-3.78833	C	MAJ-5-196
61.6853	1646.1	1.7986	-0.854958	1.7986	-0.854958	C	MAJ-5-197
62	9780.73	-2.7869	-2.37752	-3.6369	-2.77752	A-C	MAJ-5-198
62.375	9780.89	-3.6261	-2.48204	-4.4761	-2.88204	A-C	MAJ-5-199
62.75	9781.05	-4.246	-3.34559	-5.096	-3.74559	A-C	MAJ-5-200
63.125	9781.23	-6.6512	-4.12629	-7.5012	-4.52629	A-C	MAJ-5-201
63.5	9781.42	-6.2191	-3.68035	-7.0691	-4.08035	A-C	MAJ-5-202
63.875	9781.65	-6.9954	-5.68124	-7.8454	-6.08124	A-C	MAJ-5-203
64.25	9781.91	-7.4253	-4.34351	-8.2753	-4.74351	A-C	MAJ-5-204
64.625	9782.21	-5.1391	-2.91434	-5.9891	-3.31434	A-C	MAJ-5-205
65	9782.56	-5.4531	-3.51475	-6.3031	-3.91475	A-C	MAJ-5-206
65.375	9782.95	-6.158	-3.92548	-7.008	-4.32548	A-C	MAJ-5-207
65.75	9783.39	-6.14733	-4.86311	-6.99733	-5.26311	A-C	MAJ-5-208
66.125	9783.88	-4.9133	-2.96796	-5.7633	-3.36796	A-C	MAJ-5-209
66.5	9784.41	-4.7892	-2.5237	-5.6392	-2.9237	A-C	MAJ- 5-210
66.875	9784.96	-6.0797	-3.68023	-6.9297	-4.08023	A-C	MAJ-5-211
67.25	9785.5	-5.4262	-3.14281	-6.2762	-3.54281	A-C	MAJ-5-212
67.625	9786.01	-4.6514	-2.4528	-5.5014	-2.8528	A-C	MAJ-5-213
68	9786.46	-4.7413	-3.85726	-5.5913	-4.25726	A-C	MAJ-5-214
68.375	9786.84	-5.9736	-5.10115	-6.8236	-5.50115	A-C	MAJ-5-215
68.75	9787.16	-5.4994	-4.37004	-6.3494	-4.77004	A-C	MAJ-5-216
69.125	9787.46	-6.2293	-3.85874	-7.0793	-4.25874	A-C	MAJ-5-217
69.5	9787.76	-5.4539	-3.70583	-6.3039	-4.10583	A-C	MAJ-5-218
69.875	9788.09	-4.7741	-3.60247	-5.6241	-4.00247	A-C	MAJ-5-219
70.25	9788.46	-7.358	-4.77045	-8.208	-5.17045	A-C	MAJ-5-220
70.625	9788.88	-7.89089	-5.38627	-8.74089	-5.78627	A-C	MAJ-5-221
71	9789.32	-5.3352	-3.09851	-6.1852	-3.49851	A-C	MAJ-5-222
71.375	9789.76	-7.1896	-3.67808	-8.0396	-4.07808	A-C	MAJ-5-223
71.75	9790.15	-7.506	-3.56068	-8.356	-3.96068	A-C	MAJ-5-224
72.125	9790.49	-8.4711	-3.94929	-9.3211	-4.34929	A-C	MAJ-5-225
72.5	9790.75	-9.431	-5.40788	-10.281	-5.80788	A-C	MAJ-5-226
72.875	9790.97	-9.3485	-5.73837	-10.1985	-6.13837	A-C	MAJ-5-227
73.25	9791.17	-7.8001	-4.23801	-8.6501	-4.63801	A-C	MAJ-5-228
73.625	9791.37	-8.8356	-4.42723	-9.6856	-4.82723	A-C	MAJ-5-229
74	9791.6	-9.4367	-5.35418	-10.2867	-5.75418	A-C	MAJ-5-230
74.375	9791.88	-6.7911	-3.74099	-7.6411	-4.14099	A-C	MAJ-5-231
74.75	9792.21	-7.4594	-3.74272	-8.3094	-4.14272	A-C	MAJ-5-232
75.125	9792.6	-8.0318	-4.42369	-8.8818	-4.82369	A-C	MAJ-5-233
75.5	9793.03	-7.5311	-4.80308	-8.3811	-5.20308	A-C	MAJ-5-234
75.875	9793.52	-8.0087	-5.12103	-8.8587	-5.52103	A-C	MAJ-5-235
76.25	9794.07	-6.7614	-4.23482	-7.6114	-4.63482	A-C	MAJ-5-236
76.625	9794.67	-8.6818	-5.22224	-9.5318	-5.62224	A-C	MAJ-5-237
77	9795.34	-8.8472	-6.68009	-9.6972	-7.08009	A-C	MAJ-5-238
77.375	9796.08	-8.6472	-5.5758	-9.4972	-5.9758	A-C	MAJ-5-239
77.75	9796.9	-9.0988	-5.06308	-9.9488	-5.46308	A-C	MAJ-5-240
78.125	9797.82	-8.7024	-4.93802	-9.5524	-5.33802	A-C	MAJ-5-241
78.5	9798.83	-9.3587	-4.64988	-10.2087	-5.04988	A-C	MAJ-5-242
78.875	9799.9	-9.3328	-4.79152	-10.1828	-5.19152	A-C	MAJ-5-243
79.25	9801.02	-6.5479	-3.56174	-7.3979	-3.96174	A-C	MAJ-5-244
79.625	9802.17	-6.1238	-3.50023	-6.9738	-3.90023	A-C	MAJ-5-245
80	9803.33	-6.2945	-4.35933	-7.1445	-4.75933	A-C	MAJ-5-246
80.375	9804.47	-6.4574	-3.18287	-7.3074	-3.58287	A-C	MAJ-5-247
80.75	9805.6	-6.0836	-4.51704	-6.9336	-4.91704	A-C	MAJ-5-248
81.125	9806.71	-8.5301	-5.67379	-9.3801	-6.07379	A-C	MAJ-5-249
81.5	9807.81	-8.2873	-5.37652	-9.1373	-5.77652	A-C	MAJ-5-250
81.875	9808.89	-6.1811	-3.95489	-7.0311	-4.35489	A-C	MAJ-5-251
82.25	9809.97	-6.9436	-4.52912	-7.7936	-4.92912	A-C	MAJ-5-252
82.625	9811.05	-5.6497	-2.89439	-6.4997	-3.29439	A-C	MAJ-5-253
83	9812.16	-5.0221	-2.34793	-5.8721	-2.74793	A-C	MAJ-5-254
83.375	9813.3	-6.003	-3.7528	-6.853	-4.1528	A-C	MAJ-5-255
83.75	9814.52	-4.7205	-3.70012	-5.5705	-4.10012	A-C	MAJ-5-256
84.125	9815.81	-4.9915	-3.44599	-5.8415	-3.84599	A-C	MAJ-5-257
84.5	9817.2	-4.6785	-2.54687	-5.5285	-2.94687	A-C	MAJ-5-258
84.875	9818.67	-4.88	-2.99157	-5.73	-3.39157	A-C	MAJ-5-259
85.25	9820.23	-5.5044	-3.58478	-6.3544	-3.98478	A-C	MAJ-5-260
85.625	9821.84	-5.6657	-3.00268	-6.5157	-3.40268	A-C	MAJ-5-261
86	9823.52	-4.6884	-2.13098	-5.5384	-2.53098	A-C	MAJ-5-262
86.375	9825.25	-4.8825	-2.10063	-5.7325	-2.50063	A-C	MAJ-5-263
86.75	9827.04	-5.6232	-2.61995	-6.4732	-3.01995	A-C	MAJ-5-264
87.125	9828.93	-6.1262	-3.15043	-6.9762	-3.55043	A-C	MAJ-5-265
87.5	9830.91	-6.3516	-3.28634	-7.2016	-3.68634	A-C	MAJ-5-266
87.875	9833.03	-5.7956	-2.8536	-6.6456	-3.2536	A-C	MAJ-5-267
88.25	9835.27	-5.775	-3.39347	-6.625	-3.79347	A-C	MAJ-5-268
88.625	9837.62	-5.1276	-3.69252	-5.9776	-4.09252	A-C	MAJ-5-269
89	9839.99	-5.5176	-4.26628	-6.3676	-4.66628	A-C	MAJ-5-270
89.375	9842.3	-5.5279	-3.80311	-6.3779	-4.20311	A-C	MAJ-5-271
89.75	9844.48	-4.0201	-3.00811	-4.8701	-3.40811	A-C	MAJ-5-272
90.125	9846.45	-4.1307	-2.64423	-4.9807	-3.04423	A-C	MAJ-5-273
90.5	9848.22	-3.679	-3.10761	-4.529	-3.50761	A-C	MAJ-5-274
90.875	9849.93	-4.4515	-2.13005	-5.3015	-2.53005	A-C	MAJ-5-275
91.25	9851.72	-5.2445	-2.4303	-6.0945	-2.8303	A-C	MAJ-5-276
91.625	9853.74	-5.6463	-2.8967	-6.4963	-3.2967	A-C	MAJ-5-277
92	9856.13	-5.6628	-3.47245	-6.5128	-3.87245	A-C	MAJ-5-278
92.375	9858.99	-5.563	-2.66117	-6.413	-3.06117	A-C	MAJ-5-279
92.75	9862.2	-5.7733	-3.1262	-6.6233	-3.5262	A-C	MAJ-5-280
93.125	9865.61	-5.9361	-3.03431	-6.7861	-3.43431	A-C	MAJ-5-281
93.5	9869.04	-6.8732	-3.09183	-7.7232	-3.49183	A-C	MAJ-5-282
93.875	9872.33	-8.3824	-4.83453	-9.2324	-5.23453	A-C	MAJ-5-283
94.25	9875.33	-8.8903	-6.02244	-9.7403	-6.42244	A-C	MAJ-5-284
94.625	9878.02	-7.6966	-4.84512	-8.5466	-5.24512	A-C	MAJ-5-285
95	9880.49	-7.1619	-4.88205	-8.0119	-5.28205	A-C	MAJ-5-286

## Sheet: chronology
Dft (mm)	Sample no.	238U (ppb)		232Th (ppt)		230Th / 232Th (atomic x10-6)		d234U* (measured)		230Th / 238U (activity)		230Th Age (yr) (uncorrected)		230Th Age (yr) (corrected)		d234UInitial** (corrected)		230Th Age (yr BP)*** (corrected )
3	ANJB-2-U003	3371	±11	39850	±809	10	±0	5.2	±2.0	0.007	±0.0001	761	±7	419	±243	5	±2	355	±243
8	ANJB-2-008	194.6	±0.3	410	±8	20	±3	3.6	±1.7	0.0026	±0.0004	284	±47	223	±64	4	±2	161	±64
25	ANJB-2-025	4646.6	±6.6	1594	±32	216	±5	3.4	±1.4	0.0045	±0.0001	489	±7	479	±10	3	±1	417	±10
47	ANJB-2-U047	64	±0	634	±15	31	±12	3	±4.3	0.0187	±0.0074	2052	±822	1762	±845	3	±4	1697	±845
53	ANJB-2-U053R	134	±0	2325	±47	20	±4	4.6	±2.0	0.0211	±0.0037	2313	±416	1808	±547	5	±2	1743	±547
72	ANJB-2-072	67.8	±0.1	382	±8	48	±3	8.5	±2.4	0.0163	±0.0008	1778	±93	1615	±147	9	±2	1553	±147
92	ANJB-2-U092	78	±0	180	±8	92	±40	5.1	±3.5	0.0129	±0.0056	1408	±610	1341	±612	5	±4	1276	±612
105	ANJB-2-U105	117	±0	229	±9	113	±34	13.5	±2.9	0.0134	±0.0040	1450	±432	1393	±434	14	±3	1329	±434
112	ANJB-2-U112	1322	±2	7456	±150	42	±2	8.5	±2.0	0.0145	±0.0005	1576	±50	1413	±125	9	±2	1348	±125
116	AB-1a	130.9	±0.2	530	±14	136.7	±16.7	27	±3.0	0.0335393	±0.00400	3620	±439	3506	±446	27.2	±3.0	3444	±446
118	AB-2a	2569.8	±2.9	5266	±106	580.4	±11.9	7.5	±1.6	0.072126	±0.00032	8100	±40	8040	±58	7.6	±1.6	7978	±58
120	ANJB-2-U120	1710	±4	20753	±418	108	±2	9.1	±2.3	0.0796	±0.0004	8955	±48	8605	±252	9	±2	8541	±252
120	ANJB-2-U120R	2075	±3	13340	±268	197	±4	6.3	±1.5	0.0767	±0.0003	8640	±38	8454	±137	6	±2	8389	±137
130	ANJB-2-130	3042.4	±3.8	7448	±149	477	±10	6.2	±1.5	0.0709	±0.0002	7966	±26	7895	±57	6	±2	7833	±57
160	ANJB-2-160	2994.8	±4.1	2484	±50	1416	±29	4.3	±1.5	0.0712	±0.0002	8021	±30	7997	±35	4	±2	7935	±35
185	ANJB-2-U185	3490	±5	6040	±122	690	±14	3.6	±1.7	0.0724	±0.0003	8167	±33	8117	±48	4	±2	8053	±48
201	ANJB-2-U205	574	±1	1881	±38	374	±8	5.7	±1.8	0.0743	±0.0006	8367	±70	8272	±97	6	±2	8208	±97
215	ANJB-2-U215	3146	±4	5418	±109	713	±15	7	±1.5	0.0745	±0.0003	8379	±33	8329	±48	7	±2	8265	±48
251	ANJB-2-U251	4246	±5	7290	±147	745	±15	6.3	±1.3	0.0776	±0.0002	8750	±27	8700	±44	6	±1	8636	±44
275	ANJB-2-U275	6077	±9	9132	±184	861	±17	4.5	±1.5	0.0785	±0.0002	8867	±32	8823	±44	5	±2	8759	±44
280	ANJB-2-U280	5721	±18	5408	±110	1360	±28	2.4	±1.6	0.078	±0.0003	8828	±36	8801	±41	2	±2	8737	±41
302	ANJB-2-U302	9833	±44	1617	±33	8024	±166	5.2	±1.9	0.08	±0.0004	9045	±50	9041	±50	5	±2	8977	±50
Dft (mm)	Sample no.	238U (ppb)		232Th (ppt)		230Th / 232Th (atomic x10-6)		d234U* (measured)		230Th / 238U (activity)		230Th Age (yr) (uncorrected)		230Th Age (yr) (corrected)		d234UInitial** (corrected)		230Th Age (yr BP)*** (corrected )
1	MAJ-5-U001	2734	±15	3044	±63	33	±1	-3.2	±2.7	0.0023	±0.0000	246	±5	214	±24	-3	±3	150	±24
10	MAJ-5-U010	6691	±38	22757	±474	27	±1	-3.1	±3.6	0.0056	±0.0001	609	±7	510	±71	-3	±4	446	±71
22	MAJ-5-U022	3292	±4	11633	±234	31	±1	-3	±1.5	0.0067	±0.0001	736	±14	633	±74	-3	±1	569	±74
41	MAJ-5-U041	1380	±3	10604	±213	32	±1	-1.1	±2.1	0.0147	±0.0001	1617	±15	1393	±159	-1	±2	1329	±159
50	MAJ-5-U050	1224	±4	4144	±84	40	±1	-2.9	±2.4	0.0082	±0.0001	898	±15	799	±71	-3	±2	735	±71
60	MAJ-5-U060	1578	±3	14591	±293	31	±1	-0.9	±2.6	0.0173	±0.0005	1901	±56	1631	±199	-1	±3	1567	±199
66	MAJ-5-U066	12609	±83	38990	±842	461	±10	-4.6	±2.9	0.0865	±0.0006	9912	±81	9821	±103	-5	±3	9757	±103
80	MAJ-5-U080	11684	±16	27838	±559	598	±12	-2.6	±1.2	0.0864	±0.0002	9882	±24	9813	±55	-3	±1	9749	±55
89	MAJ-5-U089	10930	±12	30247	±606	519	±10	-1.2	±1.3	0.087	±0.0002	9941	±29	9860	±64	-1	±1	9796	±64
U decay constants: l238 = 1.55125x10-10 (Jaffey et al., 1971) and l234 = 2.82206x10-6 (Cheng et al., 2013). Th decay constant: l230 = 9.1705x10-6 (Cheng et al., 2013).
*d234U = ([234U/238U]activity – 1)x1000.
** d234Uinitial was calculated based on 230Th age (T), i.e., d234Uinitial = d234Umeasured x el234xT.
*** Corrected 230Th ages assume the initial 230Th/232Th atomic ratio of 4.4 ±2.2 x10-6. Those are the values for a material at secular equilibrium, with the bulk earth 232Th/238U value of 3.8. The errors are arbitrarily assumed to be 50%. B.P. stands for “Before Present” where the “Present” is defined as the year 1950 A.D.
