# Supplementary material for: Three distinct Holocene intervals of stalagmite deposition and nondeposition revealed in NW Madagascar, and their paleoclimate implications
Source: Copernicus journal article supplement (doi:10.5194/cp-13-1771-2017), 2017-12-04
Supplement: Supplementary file [file cp-13-1771-2017-supplement-title-page.pdf › cp-13-1771-2017-supplement-title-page.pdf]

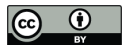

## *Supplement of*

# **Three distinct Holocene intervals of stalagmite deposition and nondeposition revealed in NW Madagascar, and their paleoclimate implications**

**Ny Riavo Gilbertinie Voarintsoa et al.**

*Correspondence to:* Ny Riavo Gilbertinie Voarintsoa (nv1@uga.edu, nyriavony@gmail.com)

- cp-13-1771-2017-supplement-title-page.pdf
- supplementary
  - ANJB2&MAJ5\_data\_for\_Clim.Past\_20171029.xlsx
  - Holocenemanuscript\_CPsupplementary\_20171029.pdf

The copyright of individual parts of the supplement might differ from the CC BY 3.0 License.
